1           **Title: Free-living psychrophilic bacteria of the genus *Psychrobacter* are**  
2 **descendants of pathobionts**

3

4           Running Title: psychrophilic bacteria descended from pathobionts

5

6           Daphne K. Welter<sup>1</sup>, Albane Ruaud<sup>1</sup>, Zachariah M. Henseler<sup>1</sup>, Hannah N. De Jong<sup>1</sup>,  
7 Peter van Coeverden de Groot<sup>2</sup>, Johan Michaux<sup>3,4</sup>, Linda Gormezano<sup>5\*</sup>, Jillian L. Waters<sup>1</sup>,  
8 Nicholas D. Youngblut<sup>1</sup>, Ruth E. Ley<sup>1\*</sup>

9

10           1. Department of Microbiome Science, Max Planck Institute for Developmental  
11 Biology,

12           Tübingen, Germany.

13           2. Department of Biology, Queen's University, Kingston, Ontario, Canada.

14           3. Conservation Genetics Laboratory, University of Liège, Liège, Belgium.

15           4. Centre de Coopération Internationale en Recherche Agronomique pour le  
16 Développement (CIRAD), UMR ASTRE, Montpellier, France.

17           5. Department of Vertebrate Zoology, American Museum of Natural History, New  
18 York, NY, USA.

19           \*deceased

20           \*Correspondence: [rley@tuebingen.mpg.de](mailto:rley@tuebingen.mpg.de)

21

22           **Abstract**

23           Host-adapted microbiota are generally thought to have evolved from free-living  
24 ancestors. This process is in principle reversible, but examples are few. The genus  
25 *Psychrobacter* (family *Moraxellaceae*, phylum *Gamma-Proteobacteria*) includes species  
26 inhabiting diverse and mostly polar environments, such as sea ice and marine animals. To  
27 probe *Psychrobacter*'s evolutionary history, we analyzed 85 *Psychrobacter* strains by

28 comparative genomics and phenotyping under 24 different growth conditions. Genome-  
29 based phylogeny shows *Psychrobacter* are derived from *Moraxella*, which are warm-adapted  
30 pathobionts. *Psychrobacter* strains form two ecotypes based on growth temperature: flexible  
31 (FE, growth at 4 - 37°C), and restricted (RE, 4 - 25°C). FE strains, which can be either  
32 phylogenetically basal or derived, have smaller genomes and higher transposon copy  
33 numbers. RE strains have larger genomes, and show genomic adaptations towards a  
34 psychrophilic lifestyle and are phylogenetically derived only. We then assessed  
35 *Psychrobacter* abundance in 86 mostly wild polar bear stools and tested persistence of  
36 select strains in germfree mice. *Psychrobacter* (both FE and RE) was enriched in stool of  
37 polar bears feeding on mammals, but only FE strains persisted in germfree mice. Together  
38 these results indicate growth at 37°C is ancestral in *Psychrobacter*, lost in many derived  
39 species, and likely necessary to colonize the mammalian gut.

40

41

## 42           **Introduction**

43

44           Whether microbiota are associated with vertebrate hosts or not is the largest factor  
45 driving differences in the composition of microbiomes sampled globally [1, 2]. Recent  
46 analysis of metagenome-assembled genomes from multiple habitats shows that many of  
47 these genomes are either animal host-enriched or environment-enriched, but generally not  
48 both [3]. Strikingly, such specialization can also be seen at higher taxonomic levels,  
49 indicating that whole lineages may have diverged once animal hosts were first successfully  
50 colonized. For instance, within the *Bacteroidetes*, the taxa that are mammal-gut associated  
51 are derived from phylogenetically basal clades that include free-living and invertebrate-  
52 associated taxa [4]. These patterns of distribution imply that specialization to the warm  
53 animal host habitat is mostly incompatible with fitness in other environments.

54           There are known exceptions: microbiota with complex lifestyles adapted to life both  
55 on and off the warm animal host. A few taxa from the phylum *Proteobacteria*, many of which  
56 are pathogens and pathobionts, inhabit mammalian bodies and have environmental  
57 reservoirs [5, 6]. Genomic adaptations that support fitness across several different  
58 environment types have been identified, many of which increase infectivity in mammals. For  
59 instance, genes that allow bacteria to avoid predation by protozoa, amoebas, and  
60 nematodes, also contribute to virulence in mammalian infections in species such as *Vibrio*  
61 *cholera*, *Burkholderia pseudomallei*, and *Yersinia pestis* [7, 8]. Genes regulating the  
62 formation of biofilms have also been implicated in the infectivity of organisms such as *V.*  
63 *cholera* [9]. Type IV pili, organelles that are important for the asymptomatic colonization of  
64 plant tissues, are also associated with mammalian tissue invasion [10]. Particular strains of  
65 virulent *Escherichia coli* serotype O157H7 show increased or decreased ability to persist in  
66 soil depending on mutations in their stress response genes, which impact survival in acid  
67 and other selection pressures [11]. In the food-borne pathogen *Listeria monocytogenes*,  
68 mutations in genes important for cell invasion also affect cold tolerance, such that strains

69 with increased persistence in processed foods are more likely to have high virulence [12].  
70 For the majority of nonpathogenic animal-associated microbiota, the adaptations to life in  
71 and on the host seem to preclude sustaining populations outside the host.

72 The evolutionary history of pathogens has been studied in depth in a few cases, and  
73 indicate an environmental ancestry. The evolutionary trajectory of commensal microbiota is  
74 less well characterized, but many likely follow the same patterns. *Mycobacterium*  
75 *tuberculosis* and *Y. pestis* are both pathogens thought to be derived from non-pathogenic,  
76 environmental organisms [13, 14]. Many *Mycobacteria* are soil microbes that can sometimes  
77 cause disease in mammals, while *M. tuberculosis* itself is only found in humans and has no  
78 known environmental reservoir [14, 15]. *Y. pestis* is closely related to pathogenic species *Y.*  
79 *pseudotuberculosis* and *Y. enterocolitica*, though other *Yersinia* spp. are nonpathogenic soil  
80 and water microbes [13, 16]. There may be cases of the inverse: where environmental  
81 bacteria are derived from animal host-associated ancestors, but well characterized examples  
82 are lacking. Experimental evolution studies in *Pseudomonas aeruginosa* and *Serratia*  
83 *marcescens* have established that a trajectory from host to environment is possible,  
84 however, and results in attenuated virulence [17, 18]. The more bacterial genomes become  
85 available for comparative studies, the better the understanding will be of how certain  
86 lineages may have moved between animal hosts and their environments.

87 Here, we investigated the evolutionary history of the genus *Psychrobacter*, a group of  
88 closely related bacteria with a broad environmental distribution. Species of *Psychrobacter*  
89 have been recovered through culture-based and sequenced-based methods from a range of  
90 animal microbiomes, including marine mammal skin [19], respiratory blow [20], and guts [21–  
91 23]; the gastrointestinal tracts of birds [24, 25] and fish [26]; and many nonhost environments  
92 such as sea water [27], sea ice [28], marine sediment [29], glacial ice [30], and permafrost  
93 soil [31]. Some *Psychrobacter* species are capable of causing disease in mammalian hosts  
94 [32, 33]. However, *Psychrobacter* infections are very rare, and the virulence factors involved  
95 are relatively uncharacterized. Intriguingly, a previous comparative genomics analysis of 26  
96 *Psychrobacter* spp. and metadata gleaned from public sources revealed differences in cold-

97 adaptation of protein coding sequences between warm-host-associated strains versus  
98 derived marine and terrestrial strains [34]. Furthermore, warm-adapted strains were basal in  
99 the *rpoB* gene phylogeny, suggesting that *Psychrobacter* evolved from a mesophilic  
100 ancestor. These observations make *Psychrobacter* an interesting candidate to assess how  
101 ecotype maps onto phylogeny and source of isolation, and to probe into the evolutionary  
102 history of a genus with a wide habitat range.

103 We tripled the collection of *Psychrobacter* genomes, which we use for phylogenomic  
104 analysis, and combine these data with extensive phenotyping applied consistently for all  
105 strains. We use a large collection of wild polar bear feces collected on ice and land to assess  
106 the presence of *Psychrobacter* ecotypes as a function of diet determined by cytochrome b  
107 barcode sequencing. Finally, we conducted tests with select strains for colonization of the  
108 mammal gut using germ-free mice. Our results confirm a mesophilic ancestry for  
109 *Psychrobacter* and a common ancestor with the genus *Moraxella*. Our phenotyping revealed  
110 that overall, *Psychrobacter* tolerate a wide range of salinity, but growth at 37 °C divided the  
111 accessions into two ecotypes: those that retained the ability to grow at warm temperatures  
112 and colonize mammalian hosts (flexible ecotype, FE), and those that exhibit adaptive  
113 evolution towards a psychrophilic lifestyle (restricted ecotype, RE). Genomic analysis of the  
114 two ecotypes shows genome reduction in the FE strains with high transposon copy numbers,  
115 and adaptation to cold in RE strains. We show that *Psychrobacter* that are basal are FE, but  
116 that FE are also interspersed with RE, indicating either re-adaptation to the animal host or  
117 retention of the basal traits. Although both FE and RE ecotypes were detected in the feces  
118 of wild polar bears, only FE strains tested could colonize the germfree mouse gut. Together  
119 our results indicate the evolutionary history of the genus *Psychrobacter* indicates a  
120 pathobiont losing its ability to associate with animals in its adaptation to nonhost  
121 environments.

122

123

## 124 **Materials and Methods**

125

126 All software versions, parameters, and the relevant citations for our analyses are  
127 detailed in Table S1.

128

129 ***Moraxellaceae* family genomics and phenotypic data.** The *Moraxallaceae* family  
130 includes three well characterized genera: *Moraxella*, *Acinetobacter* and *Psychrobacter*. To  
131 build a family-level phylogeny, we downloaded genomes of 18 species of *Acinetobacter* and  
132 18 species of *Moraxella* from NCBI (June 2020) (Table S2). We also included 15  
133 *Psychrobacter* genomes generated in this study (described below). We determined the  
134 phylogenetic relationship between the genomes using whole-genome marker gene analysis  
135 software PhyloPhlAn, and determined genome quality and summary characteristics using  
136 checkM and Prokka. The *Moraxellaceae* phylogenetic tree was visualized and annotated  
137 using the interactive Tree of Life (iTOL) web interface.

138 We analyzed the *Moraxellaceae* pan-genome using the PanX pipeline. The input  
139 genomes used by PanX were initially annotated using Prokka. After their assignment into  
140 orthologous clusters using MCL, we re-annotated gene clusters using eggNOG mapper. We  
141 explored genome content by calculating a distance matrix using the Jaccard metric through  
142 the R package ecodist from a binary gene presence-absence table, followed by dimensional  
143 reduction of that distance matrix through principle coordinate decomposition (PCoA) with the  
144 cmdscale function from the R package stats. We investigated variables contributing to the  
145 separation of the PCoA using the envfit function from the R package vegan; we tested  
146 whether genes significantly contributing to separation were “core” (genes present in 90% to  
147 100% of strains), “shell” (genes present in greater than two strains, but in fewer than 90%),  
148 or “cloud” (genes present in only one strain), and if general gene function - summarized by  
149 Cluster of Orthologous Groups (COG) category - contributed to the separation. We collected

150 growth temperature range data from type strain publications [23, 24, 27, 28, 35–76]. We  
151 used the R package phytools [77] to map the temperature ranges onto the phylogeny.

152

153 ***Psychrobacter* strains.** We obtained 92 isolates of *Psychrobacter* from strain  
154 catalogues for phenotypic and genotypic characterization. These represent 38 validly  
155 published species of *Psychrobacter* as well as unclassified strains, all isolated from a wide  
156 variety of geographical locations and diverse environmental and host samples. All strains  
157 were purchased and maintained in compliance with the Nagoya Protocol on Access to  
158 Genetic Resources and the Fair and Equitable Sharing of Benefits Arising from their  
159 Utilization to the Convention on Biological Diversity. For a full list of accessions and their  
160 catalogue, isolation, and cultivation information, see Table S3. Unless mentioned, we grew  
161 accessions as recommended by the strain catalogue (medium and temperature) from which  
162 they were purchased. We performed electron microscopy as described in the Supplemental  
163 Text.

164

165 ***Psychrobacter* phenotypic screen.** For the 85 *Psychrobacter* accessions that  
166 passed genome quality control (see Supplemental Text, Table S4), we tested their ability to  
167 grow under 24 different conditions; a growth condition being a combination of a medium  
168 (complex or defined), salt concentration (0, 2.5, 5 or 10% NaCl) and incubation temperature  
169 (4, 25 or 37 °C). For more information regarding the media choice, see Supplemental Text.

170 We randomly assigned *Psychrobacter* accessions to blocks of ten strains to be tested  
171 simultaneously (several accessions were included in multiple blocks, see Table S2). We first  
172 grew strains to saturation, washed, diluted to optical density at 600 nm ( $OD_{600}$ ) = 0.3 in  
173 sterile phosphate buffered saline (PBS), and inoculated in 100  $\mu$ L of medium with a final  
174 ratio of 1:1000. We used 96-well plates, with 10 inoculum in 5 replicates and 10 uninoculated  
175 media wells per plate, all periphery wells were filled with water to reduce edge effects. Plates  
176 were incubated at each temperature to reflect all 24 growth conditions. We measured the  
177  $OD_{600}$  (Spark® plate reader, Tecan, Zürich, Switzerland) every eight hours during the first week of

178 incubation, then every twenty-four hours, and let cultures grow until stationary phase (3 to 12  
179 weeks). We tested the carbon utilization of a subset of *Psychrobacter* accessions as described in  
180 the Supplemental Text.

181

182 **Growth probabilities.** We scored each replicate as either 'growth positive', meaning  
183 the accession grew, or else, 'growth negative,' if the replicate never reached a maximum  
184 OD<sub>600</sub> of 0.15 over the course of the experiment. For each strain and condition (medium, salt  
185 and temperature), using base R functions we calculated a growth probability, which  
186 corresponds to the median value of growth positivity/negativity of all replicates for that  
187 condition.

188

189 **Genome sequencing, assembly and annotation.** Genomic DNA was extracted  
190 from cultures grown in their preferred conditions using the Gentra Puregene Tissue Kit  
191 (Qiagen, Valencia, CA, USA). Samples were sequenced using the MiSeq 2x250 bp and  
192 HiSeq 2x150 bp paired-end read technology (Illumina, San Diego, CA, USA) as previously  
193 described [78], with some samples undergoing additional long-read sequencing using  
194 Ligation Sequencing (Oxford Nanopore, Oxford, UK). For details regarding quality control  
195 and assembly, see Supplemental Text, and for a summary of genome quality, see Table S4.  
196 Note that of the initial 92 accessions, 85 had genomes that passed all QC measures (Table  
197 S4). All further analyses use these 85 accessions.

198 We annotated genomes with Prokka and eggNOG mapper. A phylogeny of the  
199 accessions was generated using PhyloPhlAn, with *Moraxella lincolnii* as an outgroup. Again  
200 the phylogeny was visualized and annotated using iTOL. We used PanX to analyze the  
201 *Psychrobacter* pan-genome and R to explore gene presence-absence data as described  
202 above with the Moraxellaceae family. Pseudogenes were predicted using the DFAST core  
203 workflow. We used treeWAS to perform a pan-genome wide association study relating data  
204 collected in the phenotypic screen to genomic data.



205

206           **Potential cold-adaptive trait analysis.** For every gene cluster of the *Psychrobacter*  
207 pan-genome obtained, we used DIAMOND to map the consensus sequence against the  
208 UniRef90 database, excluding results from the family *Moraxellaceae*. We thus obtained  
209 homologous sequences while ensuring that the analysis would not be biased by self-  
210 comparison. Gene clusters without UniRef90 homologs were removed from further analysis.

211           The putative cold adaptive traits of every protein-coding gene from the *Psychrobacter*  
212 set and their UniRef90 homologs were evaluated following the methods of Bakermans [34].  
213 Briefly, we used the relative abundance of every amino acid per coding sequence (CDS) to  
214 calculate the arginine to lysine ratio, acidity, hydrophobicity and KVYWREP ratios [34]. We  
215 additionally calculated the grand average of hydropathicity (GRAVY) [79] and the isoelectric  
216 point (using Protein Analysis method class from Biopython). Next, we compared the  
217 distributions of these measures from *Psychrobacter* protein sequences to the distributions of  
218 the measures from the UniRef sequences. For each protein sequence, if a majority of  
219 measures were in the top 25% of the homologs distribution, we defined the protein sequence  
220 as “highly cold adaptive”. The top 25% were defined as follows for each trait: highest 25% for  
221 glycine relative abundance, acidity, hydrophobicity, and GRAVY; and the lowest 25% for  
222 proline relative abundance, arginine relative abundance, arginine-lysine ratio, isoelectric  
223 point, and KVYWREP.

224

225           **Microbiome diversity of polar bear feces.** We collected 86 polar bear fecal  
226 samples from several regions in Canada, including samples from 10 captive bears, fed  
227 varying diets or fasted, and 76 samples from an unknown number of wild bears, whose diets  
228 were determined from stool analysis (below). The feces from the captive bears were  
229 forwarded from institutions within Canada and did not require permitting for their passage to  
230 Queen's University. The captive samples comprised: five fecal samples from a single bear  
231 sequentially fed varying diets of Arctic char, harp seal and a “zoo diet” at the Polar Bear  
232 Habitat in Cochrane during 2010; two samples from each of two bears held at the Metro

233 Toronto Zoo, fed a consistent “zoo diet” during 2010; and a single sample from a bear held  
234 at the Churchill Polar Bear Holding Facility in Churchill during 2010, where the bears are  
235 given only water until release. We collected all wild bear faeces from M'Clintock Channel  
236 and Hudson Strait in Nunavut in accordance with permits prior to shipping to Queen's  
237 University: we collected 24 samples from M'Clintock Channel under *Wildlife Research*  
238 permits issued in 2007, 2008, 2009, 2010 and 2011 to Peter Van Coeverden de Groot, and  
239 nine samples from Hudson Strait collected in 2011 under *Wildlife Research* permit to  
240 Grant Gilchrest (Environment Canada). We collected 43 wild samples from the Wapusk  
241 National Park in Manitoba from 2007-2010 under a Canada Parks permit to Robert Rockwell  
242 (American Museum of Natural History).

243 We confirmed that samples collected from wild bears originated from bears by  
244 sequencing a cytochrome b gene fragment using metabarcoding approaches based on Ion  
245 Torrent (Ion Torrent Systems Inc., Gilford, NH, USA) and 454 pyrosequencing (454 Life  
246 Sciences, Branford, CT, USA) next-generation sequencing technologies [80]. We also used  
247 this method to analyze what prey animals the polar bears had been feeding on at the time of  
248 sample deposition. We visually inspected the samples for confirmation on the dietary  
249 analysis. We extracted DNA from the fecal samples using the DNeasy Blood and Tissue kit  
250 (Qiagen), and characterized the gut bacterial community by amplification and sequencing of  
251 the V4 region of the 16S rRNA gene as described previously [81]. We used QIIME for  
252 sequence processing and Silva to assign taxonomy. As described in Supplemental Text, we  
253 isolated a strain of *Psychrobacter* (*P. faecalis* PBFP-1) from polar bear feces that we  
254 included in our genomic and phenotypic analyses.

255

256 **Gnotobiotic mouse colonizations.** Based on their source of derivation and  
257 phylogenetic breadth, we selected eight accessions of *Psychrobacter* - *P. cibarius* JG-220,  
258 *P. ciconiae*, *P. faecalis* PBFP-1, *P. immobilis* S3, *P. lutiphocae*, *P. okhotskensis* MD17, *P.*  
259 *namhaensis*, and *P. pacificensis* – to monocolonize germfree mice. We grew each  
260 accession in its preferred conditions (Table S3) to saturation, spun at 10 °C at 2500 rpm for

261 25 minutes, washed with sterile PBS, resuspended in 15% (v/v) glycerol in PBS, and flash  
262 frozen in liquid N<sub>2</sub>. Inoculum samples were stored at -80 °C until the mouse experiments  
263 were performed by animal caretakers as follows. For *P. ciconiae*, *P. faecalis*, *P. namhaensis*,  
264 and *P. pacificensis*, experiments were performed at Taconic Biosciences (Rensselaer, NY,  
265 USA), while for *P. cibarius*, *P. immobilis*, and *P. okhotskensis*, experiments were performed  
266 at the Max Planck Institute for Developmental Biology. *P. lutiphocae* was included in both  
267 Taconic and MPIDB experiments.

268 Five to six-week old germfree male C57BL/6J mice were orally inoculated with  
269 approximately 10<sup>7</sup> cfu (n=4 per *Psychrobacter* accession, n = 8 for *P. lutiphocae*). Mice  
270 inoculated with the same strain were co-housed (Taconic) or single-housed (MPIDB) in  
271 sterile cages (IsoCage P, Tecniplast) and provided autoclaved water and sterile chow  
272 (NIH31M) ad libitum. Three weeks post-colonization, mice were euthanized and cecal  
273 contents were immediately collected, flash frozen, and stored at -80 °C. The Taconic  
274 experiments were performed in compliance with Taconic's IACUC, and the MPIDB  
275 experiments were approved by and performed in accordance with the local animal welfare  
276 authority's legal requirements.

277 To determine the bacterial colonization density in the mouse cecum, we serially  
278 diluted two aliquots per mouse of cecal material (50 mg each), incubated them on plates  
279 under their preferred conditions (Table S3) for three to five days. If no colonies were  
280 observed, we spread an inoculating loop of the undiluted aliquot onto Brain-Heart Infusion  
281 Agar and incubated at 37 °C for two weeks. For samples where we again observed no  
282 colonies, we categorized these *Psychrobacter* accessions as “non-persistent.” For the  
283 samples that did show colony growth, we confirmed the identity of the colonies as  
284 *Psychrobacter* using Sanger sequencing of 16S rRNA gene amplicons as described in the  
285 Supplemental Text.

286

287 **Statistical analysis.** We performed all data processing and statistical analysis using  
288 R or Python. We compared means between groups using a Kruskal-Wallis test, followed by

289 a pairwise Wilcoxon rank sum test to identify which groups differed when more than two  
290 groups were compared. We tested differences in frequencies between groups with more  
291 than 10 observations with a  $\chi^2$ -test, repeated a 100 times with down-sampling in order to  
292 correct for sampling sizes between groups. We measured phylogenetic signal using a log-  
293 likelihood ratio test on Pagel's  $\lambda$  (Pagel's  $\lambda$  fitted using the phylosig function from the  
294 phytools R package, and the null hypothesis being  $\lambda = 0$ ). When applicable, we tested for the  
295 confounding of phylogeny with our groups of interest using the aov.phylo function from the R  
296 package geiger. We adjusted all p-values for multiple comparisons with the Benjamini-  
297 Hochberg (BH) correction method.

298

## 299 **Results**

300

### 301 ***Psychrobacter* forms a clade whose basal members are of the *Moraxella***

302 **genus.** To explore the evolutionary history of *Psychrobacter*, we built a phylogeny based on  
303 400 conserved marker genes using publically available whole genomes derived from  
304 cultured isolates of 51 species from the Moraxellaceae family. We included 18 species each  
305 of *Acinetobacter* and *Moraxella* obtained from NCBI, and 15 *Psychrobacter* genomes that we  
306 generated in this study (Table S2). For all genomes, we incorporated phenotypic data  
307 collected from previously published type-strain research. Our analysis shows the 51 species  
308 formed three distinct clades with robust bootstrap support. The *Acinetobacter* clade consists  
309 uniquely of *Acinetobacter* species (labeled A in Fig 1A). The *Acinetobacter* clade is a sister  
310 taxon to the *Moraxella* (M) clade, consisting entirely of *Moraxella* species, and to the  
311 *Psychrobacter* (P) clade, which contains all of the *Psychrobacter* species, as well as four  
312 *Moraxella* species (*M. boevrei*, *M. atlantae*, *M. osloensis*, and *M. lincolnii*) that are basal in  
313 the P clade. This phylogeny indicates that these four *Moraxella* species are more closely  
314 related to *Psychrobacter* than to other *Moraxella*. P-clade *Moraxella* have more similar  
315 phenotypes compared to M-clade *Moraxella* than to *Psychrobacter* strains. Review of type

316 strain descriptions revealed that *Psychrobacter* are consistently urease positive, nitrate  
317 reducing, salt tolerant, and non-fastidious, whereas P-clade *Moraxella* are inconsistent with  
318 their urease and nitrate reducing phenotypes, are sensitive to high salt concentrations, and  
319 are often nutritionally fastidious - they have complex growth requirements (in particular, often  
320 blood or bile for growth) [23, 24, 39, 42, 50, 51, 66, 67].

321 Consistent with the topology of the phylogeny, a principal coordinates analysis  
322 (PCoA) of gene presence/absence data shows that the greatest variation within the family  
323 (*i.e.*, Principle Coordinate [PC] 1) is the separation between the A clade versus the M and P  
324 clades, which are grouped (Fig. 1). The P-clade *Moraxella* spp. fall between the P-clade  
325 *Psychrobacter* and the M-clade *Moraxella* when visualizing PC1-2 (Fig 1B) as well as PC2-3  
326 (Fig 1C). To assess what genes and gene functions may be contributing to the separation  
327 between the A-, M- and P-clades' gene presence/absence, we performed an envfit function  
328 analysis using the R package vegan. This analysis indicates that the separation along PC1  
329 and 2 is due to differences in shell genes (*i.e.*, genes present in greater than two strains, but  
330 in fewer than 90%), not to differences in their core genes (*i.e.*, genes present in between  
331 90% and 100% of strains in the clade). Genes annotated with very diverse functions, falling  
332 under almost every Cluster of Orthologous Groups (COG) category, strongly contribute to  
333 the separation between clades (Fig. 1B, Table S5).

334 Despite their close phylogenetic relationship and high similarity in gene  
335 presence/absence, *Psychrobacter* and *Moraxella* have different genomic properties. When  
336 examined by genus rather than clade, *Psychrobacter* species have an average genome size  
337 of  $3.12 \pm 0.27$  Mb, while the average of *Moraxella* is  $2.41 \pm 0.28$  Mb (pairwise Wilcoxon rank  
338 sum test, p-value =  $8e-07$ ). *Moraxella* species have an average coding density of  $86.4 \pm$   
339  $1.33\%$ , which is significantly higher than the *Psychrobacter* species average of  $82.7 \pm 1.33\%$   
340 (pairwise Wilcoxon rank sum test, p-value =  $1e-5$ ). Despite being phylogenetically more  
341 related to *Psychrobacter* species than to the other *Moraxella* species, the P-clade *Moraxella*  
342 had significantly smaller genomes than *Psychrobacter* species and greater coding density

343 (pairwise Wilcoxon rank sum test, p-values = 0.004) while not significantly different from the  
344 M-clade *Moraxella* spp. (pairwise Wilcoxon rank sum test, p-values = 0.9).

345

346 ***Psychrobacter* spp. ranges of growth temperatures differ from those of**  
347 ***Moraxella*.** To examine the phenotypic behaviors of the *Moraxellaceae* family, we applied  
348 onto the previously generated phylogeny continuous trait mapping of the ranges of  
349 temperatures at which species from the *Moraxellaceae* family were reported to grow [23, 24,  
350 27, 28, 35–75] (Fig 2). The *Psychrobacter* spp. included here are reported to have a broad  
351 range of growth temperatures (0 - 38 °C), but several strains, such as *P. frigidicola* and *P.*  
352 *glacicola*, are psychrophilic (restricted to growth below 20 °C), which is a phenotype that is  
353 not seen elsewhere in the family. Using the growth temperature information reported in the  
354 literature for this comparison, we observed that *Psychrobacter* spp. have lower minimum  
355 growth temperatures than *Moraxella* spp. from either the P- or M-clades (pairwise Wilcoxon  
356 rank sum test, p-value = 5e-06), which have a narrow range of temperatures at which they  
357 can grow (between 22 °C and 40 °C). In contrast to the minimum growth temperatures, there  
358 is little variation in the maximum growth temperatures, except for the notable exceptions of  
359 several *Psychrobacter* spp. that are restricted to growth at low temperatures.

360

361 ***Psychrobacter* spp. from diverse isolation sources show differences in**  
362 **cultivation temperatures.** To explore further *Psychrobacter*'s phenotypic diversity, we  
363 established a strain collection of 85 *Psychrobacter* accessions isolated from diverse  
364 locations (Fig S1A) and ecological sources (Fig S1B). The optimal growth temperatures for  
365 each accession - provided by the catalogues from which the accessions were ordered - vary  
366 by isolation source (Kruskal-Wallis  $\chi^2 = 43.4$ , df = 9, p-value = 2e-06), with mammalian-  
367 derived strains reported as having significantly higher cultivation temperatures than strains  
368 from fish, invertebrates, sea water, terrestrial water, and soil samples (pairwise Wilcoxon  
369 rank sum test, adjusted p-values < 0.05) (Fig. S1C). Latitude of isolation has a confounding  
370 effect on reported optimal growth temperature, but explains very little of the variance ( $r^2 =$

371 0.06,  $F(1,67) = 5.5$ ,  $p$ -value = 0.02). Examples of *Psychrobacter* morphology (*P. ciconiae*  
372 and *P. immobilis* A351) visualized by scanning and transmission electron microscopy are  
373 shown (Fig. S1D-G).

374

375 **Few *Psychrobacter* strains can grow at 37 °C.** For a direct comparison of  
376 *Psychrobacter* phenotypes, we assessed the 85 *Psychrobacter* accessions for their ability to  
377 grow under 24 different combination of medium, salt concentration and temperature (Methods  
378 & Supplemental Text). We calculated growth probabilities, or the fraction of growth positive  
379 conditions out of total conditions tested, for every strain and given variable of the growth  
380 curve screen, and compared them across the phylogeny and by isolation source. We  
381 generated a robust genus-level phylogeny for *Psychrobacter* using 400 conserved marker  
382 genes, with *M. lincolnii* as an outgroup (Fig. 3A). In agreement with single marker gene trees  
383 generated using *rpoB* sequences [34], 16S rRNA gene sequences [82], and the P-clade  
384 structure of *Moraxellaceae* family tree generated in this study, there is a phylogenetically  
385 basal group of strains mostly isolated from mammals, and a phylogenetically derived group  
386 isolated from mixed sources. Across the entire phylogeny, closely related strains have  
387 similar growth probabilities (Pagel's  $\lambda$  ranging from 0.78 to 0.97, all corrected  $p$ -values < 1e-  
388 3). We observed that most *Psychrobacter* strains are tolerant of a wide variety of  
389 temperatures between 4 and 25 °C and of salt concentrations between 0 and 5%; more than  
390 90% of all strains can grow under these conditions. However, only 54% of the tested  
391 accessions can grow at 10% added salt, and only 31% at 37 °C.

392 Since 37 °C was the most restrictive condition tested, we divided the strains into two  
393 ecotypes: the “flexible ecotype” (FE) corresponds to strains that could grow at 37 °C, and the  
394 “restricted ecotype” (RE) corresponds to strains that could not grow at 37 °C. FE strains are  
395 psychrotrophic (mesophilic organisms with a low minimum growth temperature but an  
396 optimal growth temperature above 15 °C), and RE strains are either psychrotrophs or true  
397 psychrophiles (unable to grow at temperatures higher than 20 °C).

398 Notably, the basal clade of the *Psychrobacter*-only tree (Fig 3A) consists solely of FE  
399 strains, while the rest of the phylogeny is made up of a mixture of FE and RE strains.  
400 Furthermore, the basal FE strains have higher growth probabilities at 37 °C compared to  
401 other FE strains (Pagel's  $\lambda = 0.89$ , p-value =  $2e-5$ ). Frequencies of RE and FE strains vary  
402 significantly across sources of isolation: the FE group is significantly enriched in strains  
403 derived from mammalian sources, and the RE group is significantly enriched in strains  
404 derived from fish, sea water and food sources ( $\chi^2$ -test, all p-values adjusted for group size <  
405 0.05). Nonetheless, both FE and RE ecotypes contain strains from other environments,  
406 including mammalian-derived strains within the RE group. FE strains have higher growth  
407 probabilities at low- to mid-salt concentrations (Wilcoxon rank sum test, all p-values < 0.05),  
408 though there is no difference between FE and RE strains at 10% salt (Wilcoxon rank sum  
409 test,  $W = 811.5$ ,  $p = 0.7$ ). After accounting for phylogenetic relatedness, the growth  
410 probabilities under different salt concentrations are no longer significantly different between  
411 FE and RE strains ( $F(1,83) < 24.0$ , p-value < 0.4), indicating that ecotype grossly maps onto  
412 phylogeny. Finally, FE strains show higher growth probabilities in complex media compared  
413 to defined media, while RE strains showed little difference between the two (Wilcoxon rank  
414 sum test,  $W = 1.13e3$ , p-value = 0.0005). The difference in FE and RE strains' growth  
415 probabilities under rich media remains significant after accounting for phylogenetic  
416 relatedness ( $F(1,83) = 43.4$ , p-value = 0.002).

417

418 **FE and RE *Psychrobacter* spp. have differences in genomic content.** We looked  
419 for genes differentiating the FE and RE ecotypes by performing a microbial pan-genome  
420 wide association analysis (pan-GWAS) with the R package treeWAS [83] using gene  
421 presence/absence data. While this analysis returned no significant results, strong  
422 phylogenetic signals in the gene presence/absence data may have resulted in a loss of  
423 power for the pan-GWAS. When exploring gene presence/absence via PCoA, accessions  
424 from the basal FE-only subclade cluster closely together, indicating similar gene content. In  
425 agreement with the phylogeny, these basal FE accessions are separated from the other



426 accessions on PC1, while the derived FE and RE accessions are more scattered, indicating  
427 more diverse gene content (Fig 3B). As with the separation in the *Moraxellaceae* PCoA of gene  
428 content, the separation between the basal FE-clade and the rest of the accessions is due largely  
429 to presence/absence patterns in shell genes (present in greater than one strain but fewer than  
430 90%), not core (present in between 90 to 100% of strains) or cloud genes (present only in one  
431 strain), and all contributing genes were not unique to either clade. The separation is most  
432 strongly driven by genes from the COG categories T, signal transduction ( $r^2 = 0.65$ , p-value  
433 = 0.001); U, trafficking and secretion ( $r^2 = 0.63$ , p-value = 0.001); P, inorganic ion transport  
434 and metabolism ( $r^2 = 0.56$ , p-value = 0.001), and X, unassigned or no homologs in the COG  
435 database ( $r^2 = 0.51$ , p-value = 0.001)(Fig 5B, Table S5).

436 We examined if there were qualitative differences in gene content between the FE  
437 and RE ecotypes, especially in functions related to host colonization versus cold adaptation.  
438 Both ecotypes carry genes associated with virulence [84–86] as well as genes that are  
439 potentially related to psychrophilic lifestyles [87] (Table S6).

440 We next tested whether there was a predicted difference in adaptation to cold  
441 environments in FE versus RE strains based on the amino acid properties of the protein-  
442 coding genes of their genomes. Amino acid traits have been implicated in psychrophilic  
443 lifestyles, including increased abundance of glycine, decreased abundance of proline,  
444 decreased arginine-to-lysine ratio, increased acidity, decreased isoelectric point, increased  
445 hydrophobicity, and increased GRAVY, when comparing homologs from psychrophiles to  
446 mesophiles or thermophiles [88–91]. Using these traits to define a protein sequence as cold-  
447 adaptive, REs have a higher proportion of cold-adapted proteins compared to FEs (Wilcoxon  
448 rank sum test,  $W = 407$ , p-value = 0.0006) (Fig. 3C). However, after including phylogenetic  
449 relatedness as a covariate, the difference is no longer significant ( $F(1,83) = 16.4$ ,  $p = 0.2$ ),  
450 indicating that cold adaptation in the RE is associated with their derivation from the basal  
451 strains. When comparing core proteins (present in 99 - 100% of accessions) RE strains have  
452 a higher percentage of cold-adapted core proteins than FE strains (Wilcoxon rank sum test,

453  $W = 404$ ,  $p$ -value = 0.0004) (Fig. 3D), which is again confounded with phylogenetic  
454 relatedness ( $F(1,83) = 12.4$ ,  $p = 0.2$ ).

455

456 **FEs exhibit higher transposon copy numbers than RE strains.** To determine  
457 whether there are genomic differences between the FE and RE ecotypes at a broader level  
458 than individual genes, we next examined the proportions of each genome devoted to each  
459 COG category. There are few differences between the ecotypes by COG category (Fig. S2).  
460 FEs have a significantly higher proportion of “L” category genes (replication-, recombination-,  
461 and repair-related genes) than REs (Wilcoxon rank sum test,  $W = 1.15e3$ ,  $p$ -value = 0.0005;  
462 Fig. 4A). In particular, this difference stems from a higher proportion of transposon copies  
463 per FE genome than per RE genome (Wilcoxon rank sum test,  $W = 1.08e3$ ,  $p$ -value = 0.003;  
464 Fig. 4B). As expected from the distribution of the RE and FE across the phylogeny,  
465 phylogenetic relatedness is confounded with ecotype in the effect on these difference  
466 ( $F(1,83) < 21.3$ ,  $p = 0.1$ ).

467 Increased transposon activity can lead to interruption and decay of functional protein-  
468 coding genes, leading to an increase in pseudogenes [92]. Given the higher number of  
469 transposons in FE strains, we next examined the number of predicted pseudogenes  
470 between the ecotypes. FE genomes are predicted to have a higher number of pseudogenes  
471 than RE strains (Wilcoxon rank sum test,  $W = 997$ ,  $p$ -value = 0.03; Fig. 4C). Finally, we  
472 compared the average genome size between the ecotypes, as bacterial genomes are known  
473 to strongly select against the accumulation of pseudogenes [93]. FE strains have  
474 significantly smaller genomes than RE strains (Wilcoxon rank sum test,  $W = 524$ ,  $p$ -value =  
475 0.02; Fig. 4D). As with the other genomic properties, phylogeny confounds the comparison  
476 between the FE and RE groups' pseudogene proportion and genome size ( $F(1,83) < 3.4$ ,  $p$ -  
477 value < 0.6).

478

479 **Polar bear feces collected from the Arctic ice have high abundance of**  
480 ***Psychrobacter*.** We surveyed the gut microbial diversity of 86 polar bear fecal samples, 76

481 wild and 10 captive, by 16S rRNA gene amplicon sequencing. *Psychrobacter* was detectable  
482 in 76/86 of the samples (Fig 5A). The large majority of *Psychrobacter* sequences (83%) were  
483 assigned to unclassified *Psychrobacter* spp.. We detected RE strain *P. immobilis* in 50% of  
484 samples with a mean abundance of 3%, and FE strain *P. pulmonis* in 8% of samples with a  
485 mean abundance of 0.5%.

486 Polar bear diet significantly impacted the abundance of *Psychrobacter* spp. (Kruskal-  
487 Wallis  $\chi^2 = 13.5$ , df = 3, p-value = 0.004); we found that polar bears feeding on mammalian  
488 prey, including seals and reindeer, had significantly higher abundances of unclassified  
489 *Psychrobacter* spp. than polar bears feeding on avian prey or mixed diets (pairwise Wilcoxon  
490 rank-sum test, adjusted p-values < 0.05) (Fig 5B). Unsurprisingly, diet data is confounded  
491 with location (Kruskal-Wallis  $\chi^2 = 8.6$ , df = 4, p-value = 0.0009) and year (Kruskal-Wallis  $\chi^2 =$   
492 16.6, df = 5, p-value = 0.005) of sample collection. Captive status did not significantly impact  
493 mean abundances, but there is a trend of wild bear samples having higher unclassified  
494 *Psychrobacter* spp. mean relative abundance than samples from captive bears (Wilcoxon  
495 rank sum test, W = 222, p-value = 0.08).

496

497 **Carbon source utilization patterns.** To elucidate the effect that host dietary  
498 nutrition may have on *Psychrobacter* growth, we tested the maximum change in absorbance  
499 for 190 different carbon sources by a subset of *Psychrobacter* accessions including 9 FE  
500 and 10 RE strains (Fig 5C). All *Psychrobacter* spp. reached significantly higher OD<sub>600</sub>  
501 growing on amino acid carbon sources compared to carbohydrates or sugar alcohols  
502 (pairwise Wilcoxon rank-sum test, adjusted p-values < 0.05). *Psychrobacter* spp. reach the  
503 highest OD<sub>600</sub> growing on fatty acids, surfactants, and peptides. There was no significant  
504 difference between FE and RE strains' changes in absorbance in these assays (Wilcoxon  
505 rank sum test, W = 1.55e6 , p-value = 0.08).

506

507 ***Psychrobacter* strain survival in gnotobiotic mice.** To assess the survivorship of  
508 *Psychrobacter* in a mammalian gut, we tested 8 accessions for persistence in the

509 gastrointestinal tracts of germ-free mice (Fig. 5D). Chosen for phylogenetic breadth, we  
510 tested 4 FE strains, *P. ciconiae*, *P. faecalis PBFP-1*, *P. lutiphocae*, and *P. pacificensis*, and 4  
511 RE strains, *P. cibarius JG-220*, *P. immobilis S3*, *P. namhaensis*, and *P. okhotskensis MD17*.  
512 Of the four FE strains tested, three were able to persist in the mice, while the FE strain *P.*  
513 *faecalis PBFP-1* and none of the RE strains were detectable after three weeks. Phylogenetic  
514 relatedness does not correlate with ability to colonize, as FE strain *P. pacificensis* was able  
515 to persist, while closely related RE strains, *P. namhaensis* and *P. okhotskensis*, were not.  
516 Phylogenetic placement does correlate with colonization density however, as the two most  
517 basal strains tested, *P. lutiphocae* and *P. ciconiae*, colonized at significantly higher densities  
518 than the most derived strain that was successful, *P. pacificensis* (pairwise Wilcoxon rank  
519 sum test, both adjusted p-values = 0.0007).

520

## 521 **Discussion**

522

523 The phylogenomic and phenotypic characterizations of the *Psychrobacter* genus  
524 indicates a common ancestor with *Moraxella*, all of which are restricted to growth at higher  
525 temperatures. Furthermore, the most basal members of the *Psychrobacter* clade are  
526 *Moraxella* species and species of *Psychrobacter* that can grow at 37 °C, unlike most of the  
527 derived *Psychrobacter* species. Our extensive phenotyping indicated that members of the  
528 *Psychrobacter* genus grow at a wide range of salinities and temperatures, but it is the ability  
529 to grow at 37 °C that distinguishes strains the most, and which we used to define the two  
530 ecotypes, FE and RE. Our analysis of a large collection of wild polar bear feces shows both  
531 RE and FE strains are present, however tests in germfree mice support the notion that only  
532 FE may colonize the mammal gut, whereas RE may be allochthonous members or  
533 environmental contaminants. Together with previous reports, this work indicates the genus  
534 *Psychrobacter* is a lineage of pathobionts, some of which have evolved to inhabit the colder  
535 environments of their warm-bodied hosts.

536 Our results corroborate those of Bakermann, who used the isolation source of  
537 *Psychrobacter* as a proxy for temperature adaptation to conclude the genus has a  
538 mesophilic ancestor [34]. By assessing growth under the same 24 conditions for 85 strains,  
539 we remove any ambiguity that can stem from whether an isolate can indeed grow at the  
540 temperature of its source of isolation. This is particularly important in light of our results  
541 showing that several strains isolated from mammals proved to be RE, and that many of the  
542 FE strains came from sea water or other relatively cold environments.

543 *Psychrobacter's* sister taxon *Moraxella* in particular is commonly isolated from host  
544 mucosal tissues, and exhibits the reduced genome size and nutritional fastidiousness  
545 common to many host-dependent organisms. *Moraxella* contains species that are frequently  
546 associated with human respiratory infections, primarily *M. catarrhalis* [84], as well as  
547 livestock conjunctivitis, for example, *M. bovis* or *M. equis* [94]. Since they are commonly  
548 found in healthy individuals and can cause disease in healthy individuals [95], *Moraxella* are  
549 best categorized as pathobionts and not dedicated or opportunistic pathogens. Several  
550 species of *Moraxella* appear basally in the P-clade of the *Moraxellaceae* family-level  
551 phylogeny, suggesting that *Psychrobacter* evolved from a “*Moraxella*-like” ancestor. This is  
552 supported by the fact that both phylogenetically basal and derived *Psychrobacter* strains  
553 carry genes related to virulence functions, and that many of the basal *Psychrobacter* strains  
554 exhibit growth defects in liquid culture, similar to the fastidiousness of *Moraxella*.

555 Despite clear phenotypic differentiation, *Psychrobacter* and *Moraxella* have similar  
556 genomic content, although *Psychrobacter* genomes are larger. A psychrophile emerging  
557 from an apparently mesophilic background through widespread horizontal gene transfer has  
558 been suggested before in the genus *Psychroflexus* [96], though the study was limited to  
559 comparing two genomes. In fact, it has been suggested before that this is *Psychrobacter's*  
560 evolutionary trajectory [34], and although many *Psychrobacter* trees are constructed using a  
561 *Moraxella* outgroup, *Psychrobacter's* potential pathogenic origin has not been widely  
562 discussed. Horizontal gene transfer would explain *Psychrobacter's* larger genome size  
563 compared to *Moraxella* despite lower coding density, as many newly acquired horizontally

564 transferred genes are expected to be inactivated and pruned by the recipient genome [96,  
565 97].

566 Our data show that the largest phenotypic divide within the genus is the ability to  
567 grow at 37 °C, which we used to sort strains into FE and RE. FE strains make up the basal  
568 clade of the *Psychrobacter* phylogeny. Their smaller genomes show less cold-adaptation in  
569 their protein-coding genes than RE strains with proportionally fewer cold-adaptive proteins  
570 and more transposons. The three of four FE strains tested were able to colonize germ-free  
571 mice, whereas none of the RE strains could, indicating that growth at 37 °C may be  
572 necessary (although not sufficient) to colonize mammals. Opportunistic infections in  
573 mammals caused by *Psychrobacter* strains are limited to *P. sanguinis*, *P. phenylpyruvicus*,  
574 *P. faecalis*, and *P. pulmonis* [32], which while are all FE strains. Our results suggest that the  
575 FE strains are maintaining an ancestral ability to grow at mammalian body temperatures and  
576 colonize mammalian host bodies, while RE strains have adopted a psychrophilic lifestyle.

577 Adaptation to psychrophilic lifestyles usually arises conjointly with high tolerance for  
578 salt, but at very high salt concentrations, RE strains had similar growth probabilities as FE  
579 strains. Both FE and RE strains carry genes relating to both salt tolerance and cold  
580 adaptation functions, such as compatible solute accumulation or membrane fluidity control.  
581 The similar salt tolerances of FE and RE strains is thus not surprising, given that both  
582 ecotypes have enough psychrophilic adaptation to grow well at 4 °C. There may be a  
583 difference between ecotypes in salt tolerance and cold tolerance in more extreme conditions  
584 than those we tested.

585 Phylogenetically basal FE strains show stronger growth at 37 °C than  
586 phylogenetically derived FE strains. It may be that genes responsible for ancestral strains'  
587 ability to grow at 37 °C were lost between the differentiation of the basal and derived clades.  
588 Subsequently derived *Psychrobacter* strains could have then acquired other genes providing  
589 the same FE phenotype as the basal strains, making pinpointing the genes responsible for  
590 the FE phenotype difficult. Genes that are unannotated and do not have homologs in  
591 databases such as UniRef or COG may also play a role in phenotypic and genomic

592 differentiation of FE and RE strains, so future *in vitro* phenotypic screens may be helpful in  
593 assigning function to the many hypothetical genes in the *Psychrobacter* pan-genome.

594 The difference in ecotypes could also be due to gene regulation rather than gene  
595 presence and absence. There has been some transcriptional work done in *P. arcticus* [98],  
596 but it focused on comparing gene expression at ambient temperatures (around 20 °C) to  
597 ultra-low temperatures (-10 °C) to study *P. arcticus*'s evolutionary approach to cold-  
598 adaptation. Future studies might use the same techniques to identify differences in gene  
599 expression responsible for FE strains' phenotypic plasticity by comparing gene expression at  
600 low temperatures (for example, 4 °C) to higher temperatures (37 °C).

601 Our data reveal clear genomic signatures between the ecotypes. In particular, we  
602 observed higher transposon proportions and smaller genomes in FE strains compared to RE  
603 strains. Transposon-mediated genome reduction in host-associated bacteria compared to  
604 their free-living relatives has been observed in as-of-yet unculturable light-producing  
605 symbionts from ceratoid deep-sea anglerfish [99]. While none of the *Psychrobacter* spp.  
606 exhibit the fastidiousness of truly host-dependent bacteria [100], it is striking that FE strains  
607 were more likely to grow in nutritionally complex media than defined media, compared to the  
608 RE strains, for which nutritional complexity had little impact.

609 It is possible that FE strains have enough contact with mammalian hosts that it  
610 remains advantageous for them to maintain their ability to grow at higher temperatures in  
611 rich nutritional environments. *Psychrobacter* spp. have been reported previously in the skin,  
612 respiratory, and gut microbiomes of several marine mammals, including whales, porpoises,  
613 seals, and sea lions; it could be argued that *Psychrobacter* presence is due to contamination  
614 from sea water. Polar bears hunt seals on sea ice and their diet during the summer includes  
615 bird eggs. Our data show that polar bears consuming seal meat have higher *Psychrobacter*  
616 abundance than those consuming eggs, which may result from their time on the sea ice,  
617 particularly since FE and RE were equally represented. *Psychrobacter* spp. grew to high  
618 densities when grown on amino acids, peptide mixtures, and fatty acids: all carbon sources  
619 that would be abundant in the gut of a polar bear eating fatty seal meat. This may allow FE

620 *Psychrobacter* strains to thrive in the bear gut. Given that the majority of the *Psychrobacter*  
621 diversity detected from the polar bear feces could not be classified, much remains to be  
622 learned about the natural history of this genus.

623 The history of the genus *Psychrobacter* is one of an ancestral pathobiont or  
624 pathogen, some of the descendants of which attenuated their own pathogenicity to broaden  
625 their ecological distribution. The emergence of a psychrotroph - a remarkable generalist -  
626 from a background of a more specialized pathobiont or pathogen showcases the adaptability  
627 of bacteria, and particularly *Proteobacteria*, to their environments.

628

629 **Data availability.** Raw sequences for the *Psychrobacter* genome sequencing and  
630 polar bear feces 16S rRNA gene sequencing, as well as assembled *Psychrobacter*  
631 genomes, are available in the European Nucleotide Archive under the accession  
632 PRJEB40380. Annotated *Psychrobacter* genomes are available at  
633 <ftp://ftp.tue.mpg.de/pub/ebio/dwelter>. Raw data, R notebooks, and Python scripts for the  
634 analyses are available at [https://github.com/dkwelter/Welter\\_et\\_al\\_2020](https://github.com/dkwelter/Welter_et_al_2020).

635

636 **Acknowledgments.** This work was supported by the Max Planck Society. We thank  
637 Jacobo de la Cuesta-Zuluaga, Sara Di Rienzi, Hagay Enav, Angela Poole, Jessica Sutter,  
638 Taichi Suzuki, and William Walters for discussions regarding project design and analysis,  
639 and Andrea Belkacemi, Ilya Bezrukov, Pablo Carbonell, Silke Dauser, Julia Hildebrandt, and  
640 Christa Lanz for their advice on and assistance with sequencing. We also thank Jürgen  
641 Berger and Katharina Hipp for performing electron microscopy. We thank Markus Dyck and  
642 Patricia Morin for providing the Polar Bear Habitat samples, Maria Frank for samples from  
643 the Metro Toronto Zoo, Daryll Hedman and Manitoba Conservation for the sample from the  
644 Polar Bear Holding Facility in Churchill, and Sam Iverson for samples from Hudson Strait.  
645 The collection of Nunavut samples would not have been possible without collaboration of  
646 colleagues at the Gjoa Haven Hunters and Trappers Association and their Traditional  
647 Ecological Knowledge relating to polar bears. The Nunavut field work was supported by



648 funds from the Nunavut Wildlife Management Board (NWMB), the Nunavut General  
649 Monitoring Plan (NGMP), the National Science and Engineering Research Council  
650 (NSERC), and Environment Canada (Gov. of Canada). We would also like to thank Marie  
651 Pages and Maxime Galan for assistance with cytochrome b barcode sequencing.

652

653 **Competing interest.**

654 We have no competing interests to declare.

655

656

657           **References**

- 658           1. Ley RE, Lozupone CA, Hamady M, Knight R, Gordon JI. Worlds within  
659           worlds: evolution of the vertebrate gut microbiota. *Nat Rev Microbiol* 2008; **6**: 776–788.
- 660           2. Caporaso JG, Lauber CL, Walters WA, Berg-Lyons D, Lozupone CA,  
661           Turnbaugh PJ, et al. Global patterns of 16S rRNA diversity at a depth of millions of  
662           sequences per sample. *Proc Natl Acad Sci USA* 2011; **108 Suppl 1**: 4516–4522.
- 663           3. Youngblut ND, de la Cuesta-Zuluaga J, Reischer GH, Dauser S, Schuster N,  
664           Walzer C, et al. Large scale metagenome assembly reveals novel animal-associated  
665           microbial genomes, biosynthetic gene clusters, and other genetic diversity. *mSystems*  
666           (in press).
- 667           4. Bäckhed F, Ley RE, Sonnenburg JL, Peterson DA, Gordon JI. Host-bacterial  
668           mutualism in the human intestine. *Science* 2005; **307**: 1915–1920.
- 669           5. Wolfgang MC, Kulasekara BR, Liang X, Boyd D, Wu K, Yang Q, *et al.*  
670           Conservation of genome content and virulence determinants among clinical and  
671           environmental isolates of *Pseudomonas aeruginosa*. *Proc Natl Acad Sci USA* 2003;  
672           **100**: 8484–8489.
- 673           6. Holden N, Pritchard L, Toth I. Colonization outwith the colon: plants as an  
674           alternative environmental reservoir for human pathogenic enterobacteria. *FEMS*  
675           *Microbiol Rev* 2009; **33**: 689–703.
- 676           7. French CT, Bulterys PL, Woodward CL, Tatters AO, Ng KR, Miller JF.  
677           Virulence from the rhizosphere: ecology and evolution of *Burkholderia pseudomallei*-  
678           complex species. *Curr Opin Microbiol* 2020; **54**: 18–32.
- 679           8. Waterfield NR, Wren BW, French-Constant RH. Invertebrates as a source of  
680           emerging human pathogens. *Nat Rev Microbiol* 2004; **2**: 833–841.
- 681           9. Sakib SN, Reddi G, Almagro-Moreno S. Environmental role of pathogenic  
682           traits in *Vibrio cholerae*. *J Bacteriol* 2018; **200**: e00795–17.
- 683           10. Dorr J, Hurek T. Type IV pili are involved in plant–microbe and fungus–

- 684 microbe interactions. *Mol Microbiol* 1998; **30**: 7–17.
- 685 11. van Hoek AHAM, Aarts HJM, Bouw E, van Overbeek WM, Franz E. The role  
686 of rpoS in Escherichia coli O157 manure-amended soil survival and distribution of allelic  
687 variations among bovine, food and clinical isolates. *FEMS Microbiol Lett* 2013; **338**: 18–  
688 23.
- 689 12. Hingston P, Chen J, Dhillon BK, Laing C, Bertelli C, Gannon V, *et al.*  
690 Genotypes associated with *Listeria monocytogenes* isolates displaying impaired or  
691 enhanced tolerances to cold, salt, acid, or desiccation stress. *Front Microbiol* 2017; **8**:  
692 369.
- 693 13. Wren BW. The yersiniae--a model genus to study the rapid evolution of  
694 bacterial pathogens. *Nat Rev Microbiol* 2003; **1**: 55–64.
- 695 14. Gagneux S. Ecology and evolution of *Mycobacterium tuberculosis*. *Nat Rev*  
696 *Microbiol* 2018; **16**: 202–213.
- 697 15. Orgeur M, Brosch R. Evolution of virulence in the *Mycobacterium*  
698 *tuberculosis* complex. *Curr Opin Microbiol* 2018; **41**: 68–75.
- 699 16. Savin C, Criscuolo A, Guglielmini J, Le Guern A-S, Carniel E, Pizarro-Cerdá  
700 J, *et al.* Genus-wide *Yersinia* core-genome multilocus sequence typing for species  
701 identification and strain characterization. *Microb Genom* 2019; **5**.
- 702 17. Mikonranta L, Friman V-P, Laakso J. Life history trade-offs and relaxed  
703 selection can decrease bacterial virulence in environmental reservoirs. *PLoS One* 2012;  
704 **7**: e43801.
- 705 18. Granato ET, Ziegenhain C, Marvig RL, Kümmerli R. Low spatial structure  
706 and selection against secreted virulence factors attenuates pathogenicity in  
707 *Pseudomonas aeruginosa*. *ISME J* 2018; **12**: 2907–2918.
- 708 19. Apprill A, Robbins J, Eren AM, Pack AA, Reveillaud J, Mattila D, *et al.*  
709 Humpback whale populations share a core skin bacterial community: towards a health  
710 index for marine mammals? *PLoS One* 2014; **9**: e90785.
- 711 20. Apprill A, Miller CA, Moore MJ, Durban JW, Fearnbach H, Barrett-Lennard

- 712 LG. Extensive core microbiome in drone-captured whale blow supports a framework for  
713 health monitoring. *mSystems* 2017; **2**.
- 714 21. Kudo T, Kidera A, Kida M, Kawauchi A, Shimizu R, Nakahara T, et al. Draft  
715 genome sequences of *Psychrobacter* strains JCM 18900, JCM 18901, JCM 18902, and  
716 JCM 18903, isolated preferentially from frozen aquatic organisms. *Genome Announc*  
717 2014; **2**.
- 718 22. Banks JC, Craig Cary S, Hogg ID. Isolated faecal bacterial communities  
719 found for Weddell seals, *Leptonychotes weddellii*, at White Island, McMurdo Sound,  
720 Antarctica. *Polar Biol* 2014; **37**: 1857–1864.
- 721 23. Yassin AF, Busse H-J. *Psychrobacter lutiphocae* sp. nov., isolated from the  
722 faeces of a seal. *Int J Syst Evol Microbiol* 2009; **59**: 2049–2053.
- 723 24. Kämpfer P, Jerzak L, Wilharm G, Golke J, Busse H-J, Glaeser SP.  
724 *Psychrobacter ciconiae* sp. nov., isolated from white storks (*Ciconia ciconia*). *Int J Syst*  
725 *Evol Microbiol* 2015; **65**: 772–777.
- 726 25. Kämpfer P, Glaeser SP, Irgang R, Fernández-Negrete G, Poblete-Morales  
727 M, Fuentes-Messina D, et al. *Psychrobacter pygoscelis* sp. nov. isolated from the  
728 penguin *Pygoscelis papua*. *Int J Syst Evol Microbiol* 2020; **70**: 211–219.
- 729 26. Svanevik CS, Lunestad BT. Characterisation of the microbiota of Atlantic  
730 mackerel (*Scomber scombrus*). *Int J Food Microbiol* 2011; **151**: 164–170.
- 731 27. Yoon J-H, Lee C-H, Kang S-J, Oh T-K. *Psychrobacter celer* sp. nov., isolated  
732 from sea water of the South Sea in Korea. *Int J Syst Evol Microbiol* 2005; **55**: 1885–  
733 1890.
- 734 28. Bowman JP, Nichols DS, McMeekin TA. *Psychrobacter glacincola* sp. nov., a  
735 halotolerant, psychrophilic bacterium isolated from Antarctic sea ice. *Syst Appl Microbiol*  
736 1997; **20**: 209–215.
- 737 29. Matsuyama H, Minami H, Sakaki T, Kasahara H, Watanabe A, Onoda T, et  
738 al. *Psychrobacter oceani* sp. nov., isolated from marine sediment. *Int J Syst Evol*  
739 *Microbiol* 2015; **65**: 1450–1455.

- 740                   30. Zeng Y-X, Yu Y, Liu Y, Li H-R. Psychrobacter glaciei sp. nov., isolated from  
741 the ice core of an Arctic glacier. *Int J Syst Evol Microbiol* 2016; **66**: 1792–1798.
- 742                   31. Bakermans C, Ayala-del-Río HL, Ponder MA, Vishnivetskaya T, Gilichinsky  
743 D, Thomashow MF, et al. Psychrobacter cryohalolentis sp. nov. and Psychrobacter  
744 arcticus sp. nov., isolated from Siberian permafrost. *Int J Syst Evol Microbiol* 2006; **56**:  
745 1285–1291.
- 746                   32. Deschaght P, Janssens M, Vaneechoutte M, Wauters G. Psychrobacter  
747 isolates of human origin, other than Psychrobacter phenylpyruvicus, are predominantly  
748 Psychrobacter faecalis and Psychrobacter pulmonis, with emended description of P.  
749 faecalis. *Int J Syst Evol Microbiol* 2012; **62**: 671–674.
- 750                   33. Le Guern R, Wallet F, Vega E, Courcol RJ, Loïez C. Psychrobacter  
751 sanguinis: an unusual bacterium for nosocomial meningitis. *J Clin Microbiol* 2014; **52**:  
752 3475–3477.
- 753                   34. Bakermans C. Adaptations to marine versus terrestrial low temperature  
754 environments as revealed by comparative genomic analyses of the genus  
755 Psychrobacter. *FEMS Microbiol Ecol* 2018.
- 756                   35. Vela AI, Sánchez-Porro C, Aragón V, Olvera A, Domínguez L, Ventosa A, et  
757 al. Moraxella porci sp. nov., isolated from pigs. *Int J Syst Evol Microbiol* 2010; **60**: 2446–  
758 2450.
- 759                   36. Vela AI, Arroyo E, Aragón V, Sánchez-Porro C, Latre MV, Cerdà-Cuéllar M,  
760 et al. Moraxella pluranimalium sp. nov., isolated from animal specimens. *Int J Syst Evol*  
761 *Microbiol* 2009; **59**: 671–674.
- 762                   37. Lindqvist K. A Neisseria species associated with infectious  
763 keratoconjunctivitis of sheep: Neisseria ovis nov. spec. *The Journal of Infectious*  
764 *Diseases* March-April 1960; **106**: 162–165.
- 765                   38. Xie C-H, Yokota A. Transfer of the misnamed [Alysiella] sp. IAM 14971  
766 (=ATCC 29468) to the genus Moraxella as Moraxella oblonga sp. nov. *Int J Syst Evol*  
767 *Microbiol* 2005; **55**: 331–334.

- 768                   39. Boevre K, Henriksen SD. A new *Moraxella* species, *Moraxella osloensis*, and  
769 a revised description of *Moraxella nonliquefaciens*. *Int J Syst Evol Microbiol* 1967; **17**.
- 770                   40. Catlin BW. Transfer of the organism named *Neisseria Catarrhalis* to  
771 *Branhamella* gen. nov. *Int J Syst Bacteriol* 1970; **20**: 155–159.
- 772                   41. Eyre JW. A clinical and bacteriological study of diplo-bacillary conjunctivitis.  
773 *Journal of Pathology and Bacteriology* 1900; **6**: 1–13.
- 774                   42. Vandamme P, Gillis M, Vancanneyt I. M, Hoste I. B, Kersters K, Falsen E.  
775 *Moraxella lincolnii* sp. nov., isolated from the human respiratory tract, and reevaluation  
776 of the taxonomic position of *Moraxella osloensis*. *Int J Syst Bacteriol* 1993; **43**: 474–481.
- 777                   43. PJ Huntington, PJ Coloe, JD Bryden, and F MacDonald. Isolation of a  
778 *Moraxella* sp from horses with conjunctivitis. *Australian Veterinary Journal* 1987; **64**:  
779 118–119.
- 780                   44. U. B. Über das Vorkommen von Neisserien bei einigen Tieren. *Zeitschrift f*  
781 *Hygiene* 1962; **148**: 445–457.
- 782                   45. Pelczar MJ Jr. *Neisseria caviae* nov spec. *J Bacteriol* 1953; **65**: 744.
- 783                   46. Kodjo A, Tønjum T, Richard 2. Yves, Bq)vre K. *Moraxella caprae* sp. nov., a  
784 new member of the classical *Moraxellae* with very close affinity to *Moraxella bovis*. *Int J*  
785 *Syst Bacteriol* 1995; **45**: 467–471.
- 786                   47. Jannes G, Vaneechou'tte M, La"o 2. Martine, Gillis 3. Monique, Vancanneyt  
787 3. Marc, Vandamme 3. Peter, *et al.* Polyphasic taxonomy leading to the proposal of  
788 *Moraxella canis* sp. nov. for *Moraxella catarrhalis*-like strains. *Int J Syst Bacteriol* 1993;  
789 **43**: 438–449.
- 790                   48. Angelos JA, Spinks PQ, Ball LM, George LW. *Moraxella bovoculi* sp. nov.,  
791 isolated from calves with infectious bovine keratoconjunctivitis. *Int J Syst Evol Microbiol*  
792 2007; **57**: 789–795.
- 793                   49. Henriksen SD. Designation of a neotype strain for *Moraxella bovis* (Hauduroy  
794 et al.) Murray. *Int J Syst Evol Microbiol* 1971; **21**: 28–28.
- 795                   50. Kodjo A, Richard ". Yves, Tønjum T. *Moraxella boevrei* sp. nov., a new

- 796 Moraxella Species found in goats. *Int J Syst Bacteriol* 1997; **47**: 115–121.
- 797 51. K. Boevre, J.E. Fuglesang, N. Hagen, E. Jantzen, and L.O. Froeholm.
- 798 Moraxella atlantae sp. nov. and its distinction from Moraxella phenylpyrouvica. *Int J Syst*
- 799 *Bacteriol* 1976; **26**: 511–521.
- 800 52. Vaneechoutte M, Nemecek A, Musílek M, van der Reijden TJK, van den
- 801 Barselaar M, Tjernberg I, et al. Description of Acinetobacter venetianus ex Di Cello *et al.*
- 802 1997 sp. nov. *Int J Syst Evol Microbiol* 2009; **59**: 1376–1381.
- 803 53. Nemecek A, De Baere T, Tjernberg I, Vaneechoutte M, van der Reijden TJ,
- 804 Dijkshoorn L. Acinetobacter ursingii sp. nov. and Acinetobacter schindleri sp. nov.,
- 805 isolated from human clinical specimens. *Int J Syst Evol Microbiol* 2001; **51**: 1891–1899.
- 806 54. Nishimura Y, Ino T, Iizuka H. Acinetobacter radioresistens sp. nov. isolated
- 807 from cotton and soil. *Int J Syst Evol Microbiol* 1988; **38**: 209–211.
- 808 55. Li Y, Piao C-G, Ma Y-C, He W, Wang H-M, Chang J-P, et al. Acinetobacter
- 809 puyangensis sp. nov., isolated from the healthy and diseased part of Populus
- 810 xeuramericana canker bark. *Int J Syst Evol Microbiol* 2013; **63**: 2963–2969.
- 811 56. Yang Liu, Qihua Rao, Jiefeng Tu, Jiaonan Zhang, Minmin Huang, Bing Hu,
- 812 Qiu Lin and Tuyan Luo. Acinetobacter piscicola sp. nov., isolated from diseased farmed
- 813 Murray cod (Maccullochella peelii peelii). *Int J Syst Evol Microbiol* 2018; **68**: 905–910.
- 814 57. Choi JY, Ko G, Jheong W, Huys G, Seifert H, Dijkshoorn L, *et al.*
- 815 Acinetobacter kookii sp. nov., isolated from soil. *Int J Syst Evol Microbiol* 2013; **63**:
- 816 4402–4406.
- 817 58. Malhotra J, Anand S, Jindal S, Rajagopal R, Lal R. Acinetobacter indicus sp.
- 818 nov., isolated from a hexachlorocyclohexane dump site. *Int J Syst Evol Microbiol* 2012;
- 819 **62**: 2883–2890.
- 820 59. Nemecek A, Musílek M, Maixnerová M, De Baere T, van der Reijden TJK,
- 821 Vaneechoutte M, et al. Acinetobacter beijerinckii sp. nov. and Acinetobacter gyllenbergii
- 822 sp. nov., haemolytic organisms isolated from humans. *Int J Syst Evol Microbiol* 2009;
- 823 **59**: 118–124.

- 824                   60. Smet A, Cools P, Krizova L, Maixnerova M, Sedo O, Haesebrouck F, et al.  
825                   Acinetobacter gandensis sp. nov. isolated from horse and cattle. *Int J Syst Evol*  
826                   *Microbiol* 2014; **64**: 4007–4015.
- 827                   61. Nemeč A, Radolfova-Krizova L, Maixnerova M, Vrestiakova E, Jezek P,  
828                   Sedo O. Taxonomy of haemolytic and/or proteolytic strains of the genus Acinetobacter  
829                   with the proposal of Acinetobacter courvalinii sp. nov. (genomic species 14 *sensu*  
830                   Bouvet & Jeanjean), Acinetobacter dispersus sp. nov. (genomic species 17),  
831                   Acinetobacter modestus sp. nov., Acinetobacter proteolyticus sp. nov. and  
832                   Acinetobacter vivianii sp. nov. *Int J Syst Evol Microbiol* 2016; **66**: 1673–1685.
- 833                   62. Nemeč A, Radolfova-Krizova L, Maixnerova M, Sedo O. Acinetobacter  
834                   colistiniresistens sp. nov. (formerly genomic species 13 *sensu* Bouvet and Jeanjean and  
835                   genomic species 14 *sensu* Tjernberg and Ursing), isolated from human infections and  
836                   characterized by intrinsic resistance to polymyxins. *Int J Syst Evol Microbiol* 2017; **67**:  
837                   2134–2141.
- 838                   63. Radolfova-Krizova L, Maixnerova M, Nemeč A. Acinetobacter celticus sp.  
839                   nov., a psychrotolerant species widespread in natural soil and water ecosystems. *Int J*  
840                   *Syst Evol Microbiol* 2016; **66**: 5392–5398.
- 841                   64. Álvarez-Pérez S, Lievens B, Jacquemyn H, Herrera CM. Acinetobacter  
842                   nectaris sp. nov. and Acinetobacter boissieri sp. nov., isolated from floral nectar of wild  
843                   Mediterranean insect-pollinated plants. *Int J Syst Evol Microbiol* 2013; **63**: 1532–1539.
- 844                   65. Bouvet P and Grimont P. Taxonomy of the genus Acinetobacter with the  
845                   recognition of Acinetobacter baumannii sp. nov. Acinetobacter haemolyticus sp. nov.  
846                   Acinetobacter johnsonii sp. nov. and Acinetobacter junii sp. nov. and emended  
847                   descriptions of Acinetobacter calcoaceticus and Acinetobacter lwoffii. *Int J Syst*  
848                   *Bacteriol* 1986; **36**: 228–240.
- 849                   66. Wirth SE, Ayala-del-Río HL, Cole JA, Kohlerschmidt DJ, Musser KA,  
850                   Sepúlveda-Torres L del C, et al. Psychrobacter sanguinis sp. nov., recovered from four  
851                   clinical specimens over a 4-year period. *Int J Syst Evol Microbiol* 2012; **62**: 49–54.



- 852                    67. Baik KS, Park SC, Lim CH, Lee KH, Jeon DY, Kim CM, et al. Psychrobacter  
853                    aestuarii sp. nov., isolated from a tidal flat sediment. *Int J Syst Evol Microbiol* 2010; **60**:  
854                    1631–1636.
- 855                    68. Bowman JP, Cavanagh J, Austin JJ, Sanderson K. Novel Psychrobacter  
856                    species from Antarctic ornithogenic soils. *Int J Syst Bacteriol* 1996; **46**: 841–848.
- 857                    69. Kämpfer P, Albrecht A, Buczolits S, Busse H-J. Psychrobacter faecalis sp.  
858                    nov., a new species from a bioaerosol originating from pigeon faeces. *Syst Appl*  
859                    *Microbiol* 2002; **25**: 31–36.
- 860                    70. Romanenko LA, Lysenko AM, Rohde M, Mikhailov VV, Stackebrandt E.  
861                    Psychrobacter maritimus sp. nov. and Psychrobacter arenosus sp. nov., isolated from  
862                    coastal sea ice and sediments of the Sea of Japan. *Int J Syst Evol Microbiol* 2004; **54**:  
863                    1741–1745.
- 864                    71. Yumoto I, Hirota K, Sogabe Y, Nodasaka Y, Yokota Y, Hoshino T.  
865                    Psychrobacter okhotskensis sp. nov., a lipase-producing facultative psychrophile  
866                    isolated from the coast of the Okhotsk Sea. *Int J Syst Evol Microbiol* 2003; **53**: 1985–  
867                    1989.
- 868                    72. Juni E, Heym GA. Psychrobacter immobilis gen. nov., sp. nov.: Genospecies  
869                    Composed of Gram-Negative, Aerobic, Oxidase-Positive Coccobacilli. *Int J Syst Evol*  
870                    *Microbiol* 1986; **36**: 388–391.
- 871                    73. Yoon J-H, Lee C-H, Yeo S-H, Oh T-K. Psychrobacter aquimaris sp. nov. and  
872                    Psychrobacter namhaensis sp. nov., isolated from sea water of the South Sea in Korea.  
873                    *Int J Syst Evol Microbiol* 2005; **55**: 1007–1013.
- 874                    74. Maruyama A, Honda D, Yamamoto H, Kitamura K, Higashihara T.  
875                    Phylogenetic analysis of psychrophilic bacteria isolated from the Japan Trench,  
876                    including a description of the deep-sea species Psychrobacter pacificensis sp. nov. *Int J*  
877                    *Syst Evol Microbiol* 2000; **50 Pt 2**: 835–846.
- 878                    75. Yumoto I, Hirota K, Kimoto H, Nodasaka Y, Matsuyama H, Yoshimune K.  
879                    Psychrobacter piscatorii sp. nov., a psychrotolerant bacterium exhibiting high catalase

- 880 activity isolated from an oxidative environment. *Int J Syst Evol Microbiol* 2010; **60**: 205–  
881 208.
- 882 76. Poppel MT, Skiebe E, Laue M, Bergmann H, Ebersberger I, Garn T, *et al.*  
883 *Acinetobacter equi* sp. nov., isolated from horse faeces. *Int J Syst Evol Microbiol* 2016;  
884 **66**: 881–888.
- 885 77. Revell LJ. phytools: an R package for phylogenetic comparative biology (and  
886 other things). *Methods Ecol Evol* 2012; **3**: 217–223.
- 887 78. Karasov TL, Almario J, Friedemann C, Ding W, Giolai M, Heavens D, *et al.*  
888 *Arabidopsis thaliana* and *Pseudomonas* Pathogens Exhibit Stable Associations over  
889 Evolutionary Timescales. *Cell Host Microbe* 2018; **24**: 168–179.e4.
- 890 79. Kyte J, Doolittle RF. A simple method for displaying the hydrophobic  
891 character of a protein. *J Mol Biol* 1982; **157**: 105–132.
- 892 80. Galan M, Pagès M, Cosson J-F. Next-generation sequencing for rodent  
893 barcoding: species identification from fresh, degraded and environmental samples.  
894 *PLoS One* 2012; **7**: e48374.
- 895 81. Goodrich JK, Waters JL, Poole AC, Sutter JL, Koren O, Blekhman R, *et al.*  
896 Human genetics shape the gut microbiome. *Cell* 2014; **159**: 789–799.
- 897 82. Dziewit L, Cegielski A, Romaniuk K, Uhrynowski W, Szych A, Niesiobedzki  
898 P, *et al.* Plasmid diversity in arctic strains of *Psychrobacter* spp. *Extremophiles* 2013;  
899 **17**: 433–444.
- 900 83. Collins C, Didelot X. A phylogenetic method to perform genome-wide  
901 association studies in microbes that accounts for population structure and  
902 recombination. *PLoS Comput Biol* 2018; **14**: e1005958.
- 903 84. Perez Vidakovics ML, Riesbeck K. Virulence mechanisms of *Moraxella* in the  
904 pathogenesis of infection. *Curr Opin Infect Dis* 2009; **22**: 279–285.
- 905 85. Zhou Q, Feng S, Zhang J, Jia A, Yang K, Xing K, *et al.* Two  
906 glycosyltransferase genes of *Haemophilus parasuis* SC096 implicated in  
907 lipooligosaccharide biosynthesis, serum resistance, adherence, and invasion. *Front Cell*

- 908        *Infect Microbiol* 2016; **6**: 100.
- 909                86. Weinberg ED. Iron availability and infection. *Biochim Biophys Acta* 2009;
- 910        **1790**: 600–605.
- 911                87. Collins T, Margesin R. Psychrophilic lifestyles: mechanisms of adaptation
- 912        and biotechnological tools. *Appl Microbiol Biotechnol* 2019; **103**: 2857–2871.
- 913                88. Feller G. Psychrophilic enzymes: from folding to function and biotechnology.
- 914        *Scientifica* 2013; **2013**: 512840.
- 915                89. Gerday C. Psychrophily and catalysis. *Biology* 2013; **2**: 719–741.
- 916                90. De Maayer P, Anderson D, Cary C, Cowan DA. Some like it cold:
- 917        understanding the survival strategies of psychrophiles. *EMBO Rep* 2014; **15**: 508–517.
- 918                91. Fields PA, Dong Y, Meng X, Somero GN. Adaptations of protein structure
- 919        and function to temperature: there is more than one way to ‘skin a cat’. *J Exp Biol* 2015;
- 920        **218**: 1801–1811.
- 921                92. Bobay L-M, Ochman H. The evolution of bacterial genome architecture.
- 922        *Front Genet* 2017; **8**: 72.
- 923                93. Kuo C-H, Ochman H. Deletional bias across the three domains of life.
- 924        *Genome Biol Evol* 2009; **1**: 145–152.
- 925                94. Hughes DE, Pugh GW Jr. Isolation and description of a *Moraxella* from
- 926        horses with conjunctivitis. *Am J Vet Res* 1970; **31**: 457–462.
- 927                95. Whitman WB, Rainey F, Kämpfer P, Trujillo M, Chun J, DeVos P, *et al.* (eds).
- 928        *Moraxella*. *Bergey’s Manual of Systematics of Archaea and Bacteria*. 2015. John Wiley
- 929        & Sons, Ltd, Chichester, UK, pp 1–17.
- 930                96. Feng S, Powell SM, Wilson R, Bowman JP. Extensive gene acquisition in the
- 931        extremely psychrophilic bacterial species *Psychroflexus torquis* and the link to sea-ice
- 932        ecosystem specialism. *Genome Biol Evol* 2014; **6**: 133–148.
- 933                97. Liu Y, Harrison PM, Kunin V, Gerstein M. Comprehensive analysis of
- 934        pseudogenes in prokaryotes: widespread gene decay and failure of putative horizontally
- 935        transferred genes. *Genome Biol* 2004; **5**: R64.

936                    98. Bergholz PW, Bakermans C, Tiedje JM. Psychrobacter arcticus 273-4 uses  
937                    resource efficiency and molecular motion adaptations for subzero temperature growth. *J*  
938                    *Bacteriol* 2009; **191**: 2340–2352.

939                    99. Hendry TA, Freed LL, Fader D, Fenolio D, Sutton TT, Lopez JV. Ongoing  
940                    transposon-mediated genome reduction in the luminous bacterial symbionts of deep-  
941                    sea ceratioid anglerfishes. *MBio* 2018; **9**.

942                    100. Moran NA. Tracing the evolution of gene loss in obligate bacterial  
943                    symbionts. *Curr Opin Microbiol* 2003; **6**: 512–518.

944

945

946 **Figure Legends**

947 **Figure 1. Genomic and phenotypic diversity in the family *Moraxellaceae*.** A) The  
948 *Moraxellaceae* family phylogeny was constructed with 51 diverse *Moraxellaceae* genomes  
949 using the software PhyloPhlan, which constructs a phylogeny using fasttree with 1000  
950 bootstraps, refined by RAxML under the PROTCATG model. Amino acid sequences from  
951 400 marker genes were used in the alignment. Branches with bootstrap support greater than  
952 70% are represented by filled circles. The scale bar represents the average amino acid  
953 substitutions per site. *Pseudomonas aeruginosa* was used as an outgroup. Clades are  
954 highlighted in colored blocks, and branches are colored by genus. Isolation source is  
955 depicted in a color strip, along with a heatmap of scaled notable genome characteristics that  
956 differ between the genera, with 0 representing the smallest value present and 1 the largest  
957 value (*P. aeruginosa* not included). GS = Genome size, ranging between 1.8 Mb and 4.5  
958 Mb. PCoA = PC1 values from a PCoA based on gene presence/absence data. CD =  
959 genome coding density, ranging from 80% to 89%. Growth temperature range data was  
960 collected from type strain publications. B) PC1 and 2 of a PCoA analysis of a binary matrix of  
961 gene presence/absence for 51 species of *Moraxellaceae*, explaining 32% and 14% of the  
962 variation, respectively. Each genome is represented by one point, colored by genus. The P-  
963 clade *Moraxella* spp. are represented by yellow points with red outlines. The frequencies of  
964 genes associated with each COG category were associated with the PCoA axes as  
965 environmental vectors via the envfit function. All COG categories are significant (BH  
966 correction, p-value < 0.05), except L (replication, recombination and repair) and Z  
967 (cytoskeleton assembly and regulation) which are shown in pink vectors. COG categories  
968 with an  $r^2 > 0.5$  are shown in dark grey, while categories with an  $r^2 < 0.5$  are shown in light  
969 grey. C) PC2 and 3, explaining 14% and 5% of the variation.

970

971 **Figure 2. *Psychrobacter's* restriction to cold temperatures is a newly emerged**  
972 **trait in the family *Moraxellaceae*.** Continuous trait mapping growth temperature ranges of

973 51 species from the *Moraxellaceae* family, taken from type strain publications. Values at  
974 nodes are imputed by maximum likelihood analysis. The phylogeny was constructed by  
975 marker-gene analysis including 400 genes, as in Fig. 1. Genera are indicated with colored  
976 boxes.

977

978 **Figure 3. *Psychrobacter* phenotypic and genomic diversity.** A) Using 85  
979 *Psychrobacter* genomes, we constructed a genus-level phylogeny using fasttree with 1000  
980 bootstraps, refined by RAxML under the PROTCATG model. Amino acid sequences from  
981 400 marker genes were used in the alignment. Branches with bootstrap support greater than  
982 70% are represented by filled circles. The scale bar represents the average amino acid  
983 substitutions per site. *M. lincolnii* was used as an outgroup. Type strain isolate names are  
984 indicated in bold and italicized type. Strains indicated with \* next to their name exhibited  
985 growth defects in liquid media, and were tested on solid agar media instead. Strains  
986 indicated with \*\* exhibited growth defects on solid and liquid media, and were tested on solid  
987 media supplemented with 0.1% Tween80. Strains indicated with a mouse silhouette were  
988 later used in germ-free mouse colonization studies (Fig 5). Isolation source is depicted in  
989 column 1 as a color strip. Columns 2 – 10 represent the growth probabilities of each strain  
990 for each condition; media complexity is represented in yellow, salt concentration is  
991 represented in blue, and temperature is represented in red. Type strain data supports our  
992 temperature data except where indicated - colored triangles show conditions in which we  
993 expected growth but did not observe it, while white triangles represent conditions in which  
994 we observed growth we did not expect. The ecotype is shown in column 11 in a colorstrip,  
995 and in the color of the branches. B) The first two PCs of a PCoA of a gene presence-  
996 absence matrix of all 85 of the included accessions, colored by ecotype. The basal clade  
997 strains are shown within the ellipse. The frequencies of genes associated with each COG  
998 category were associated with the PCoA axes as environmental vectors. All COG categories  
999 are significant (BH correction, p-value < 0.05), except G (carbohydrate transport and  
1000 metabolism) and H (coenzyme transport and metabolism) which are shown in pink vectors.

1001 COG categories with an  $r^2 > 0.5$  are shown in dark grey, while categories with an  $r^2 < 0.5$  are  
1002 shown in light grey. C) The proportion of genes per genome falling in the highest quartile of  
1003 “high cold adaptive amino acid traits” from each ecotype (n = 26 for FE, n = 59 for RE). D)  
1004 the number of “core genes” (present in all 85 *Psychrobacter* accessions) that fall into the  
1005 highest quartile of “high cold adaptive amino acid traits” (n = 26 for FE, n = 59 for RE). For all  
1006 mean comparisons, the Wilcoxon rank sum test was used. \*\* indicates a p-value < 0.005, \*\*\*  
1007 indicates a p-value < 0.0005.

1008

1009 **Figure 4. Divergence of ecotypes could be driven by transposon-mediated**  
1010 **genome reduction.** A) proportion of Cluster of Orthologous Groups (COG) category “L”  
1011 (replication, recombination, and repair related) genes per genome. B) copy numbers per  
1012 genome of all the transposases in the *Psychrobacter* pan-genome. C) Proportion of  
1013 predicted pseudogenes per genome. D) *Psychrobacter* accession genome size in  
1014 megabases. For all mean comparisons, the Wilcoxon rank sum test was used. \* indicates a  
1015 p-value < 0.05, \*\* indicates a p-value < 0.005. For each comparison, n = 26 for FE strains  
1016 and n = 59 for RE strains.

1017

1018 **Figure 5. *Psychrobacter* strains occur and persist in the mammalian gut.** A)  
1019 Relative abundance at the genus level of 16S rRNA gene OTUs, clustered at 99% identity,  
1020 of 86 polar bear fecal samples. *Psychrobacter* OTUs are colored red. B) *Psychrobacter*  
1021 relative abundance in comparison to taxonomy of prey consumed by polar bears (n = 1 for  
1022 *Actinoterygii*, n = 24 for *Aves*, n = 16 for mixed prey, and n = 32 for *Mammalia*). C) The  
1023 average change in OD600 of 19 *Psychrobacter* accessions grown on 190 different  
1024 substrates as sole carbon sources, compared across different classes of compounds. D)  
1025 CFUs per gram of cecal contents of gnotobiotic mice is shown in comparison to accession  
1026 phylogeny. 4 mice were tested per *Psychrobacter* strain, except *P. lutiphocae*, which was  
1027 tested in 8 mice. FE strains are shown in yellow, while RE strains are shown in blue. The  
1028 phylogeny was constructed as described in Fig. 3. Branches with bootstrap support higher

1029 than 70% are indicated with a filled circle.

1030 Means were compared using the Wilcoxon rank-sum test. \*\*\* indicates a p-value < 0.0005,

1031 \*\* indicates p-value < 0.005, \* indicates p < 0.05.

1032



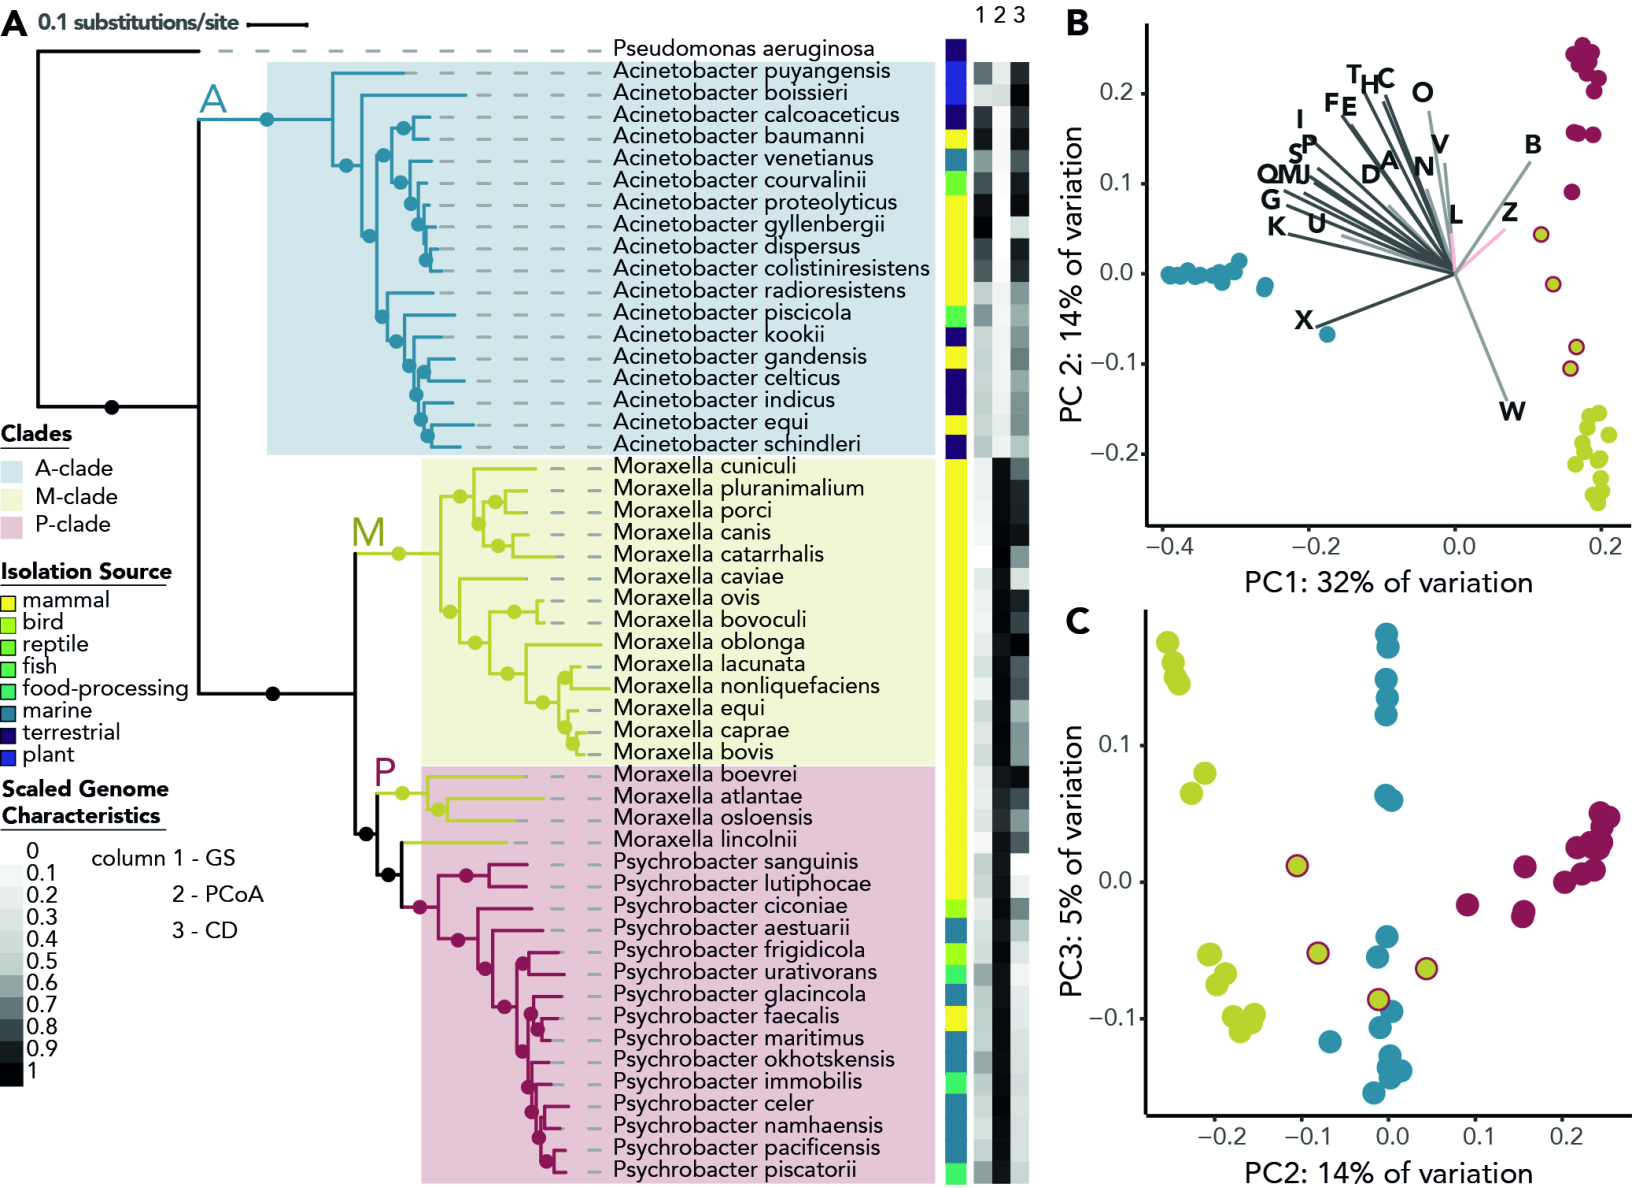

Minimum Temperature

Maximum Temperature

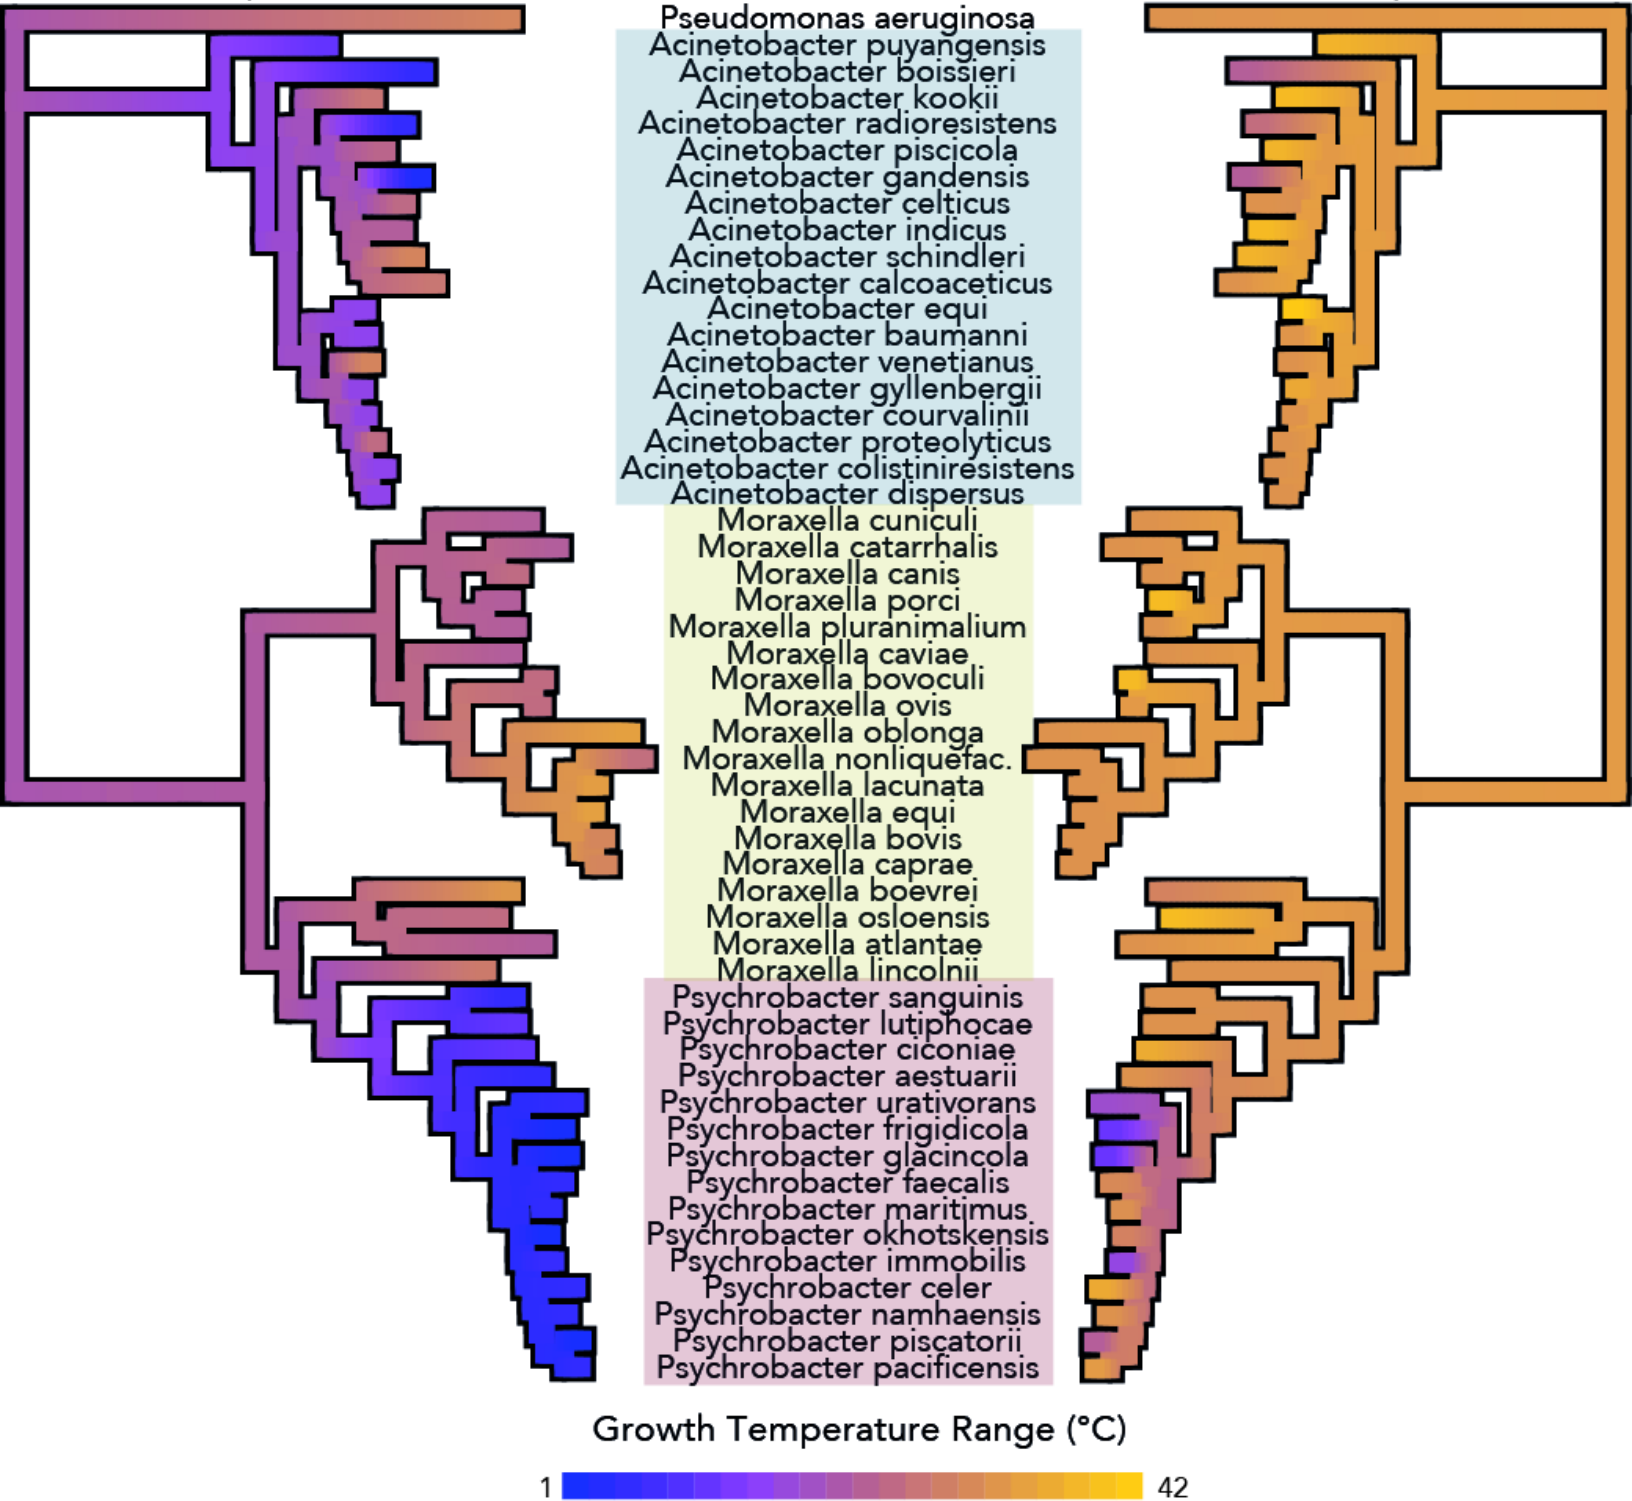

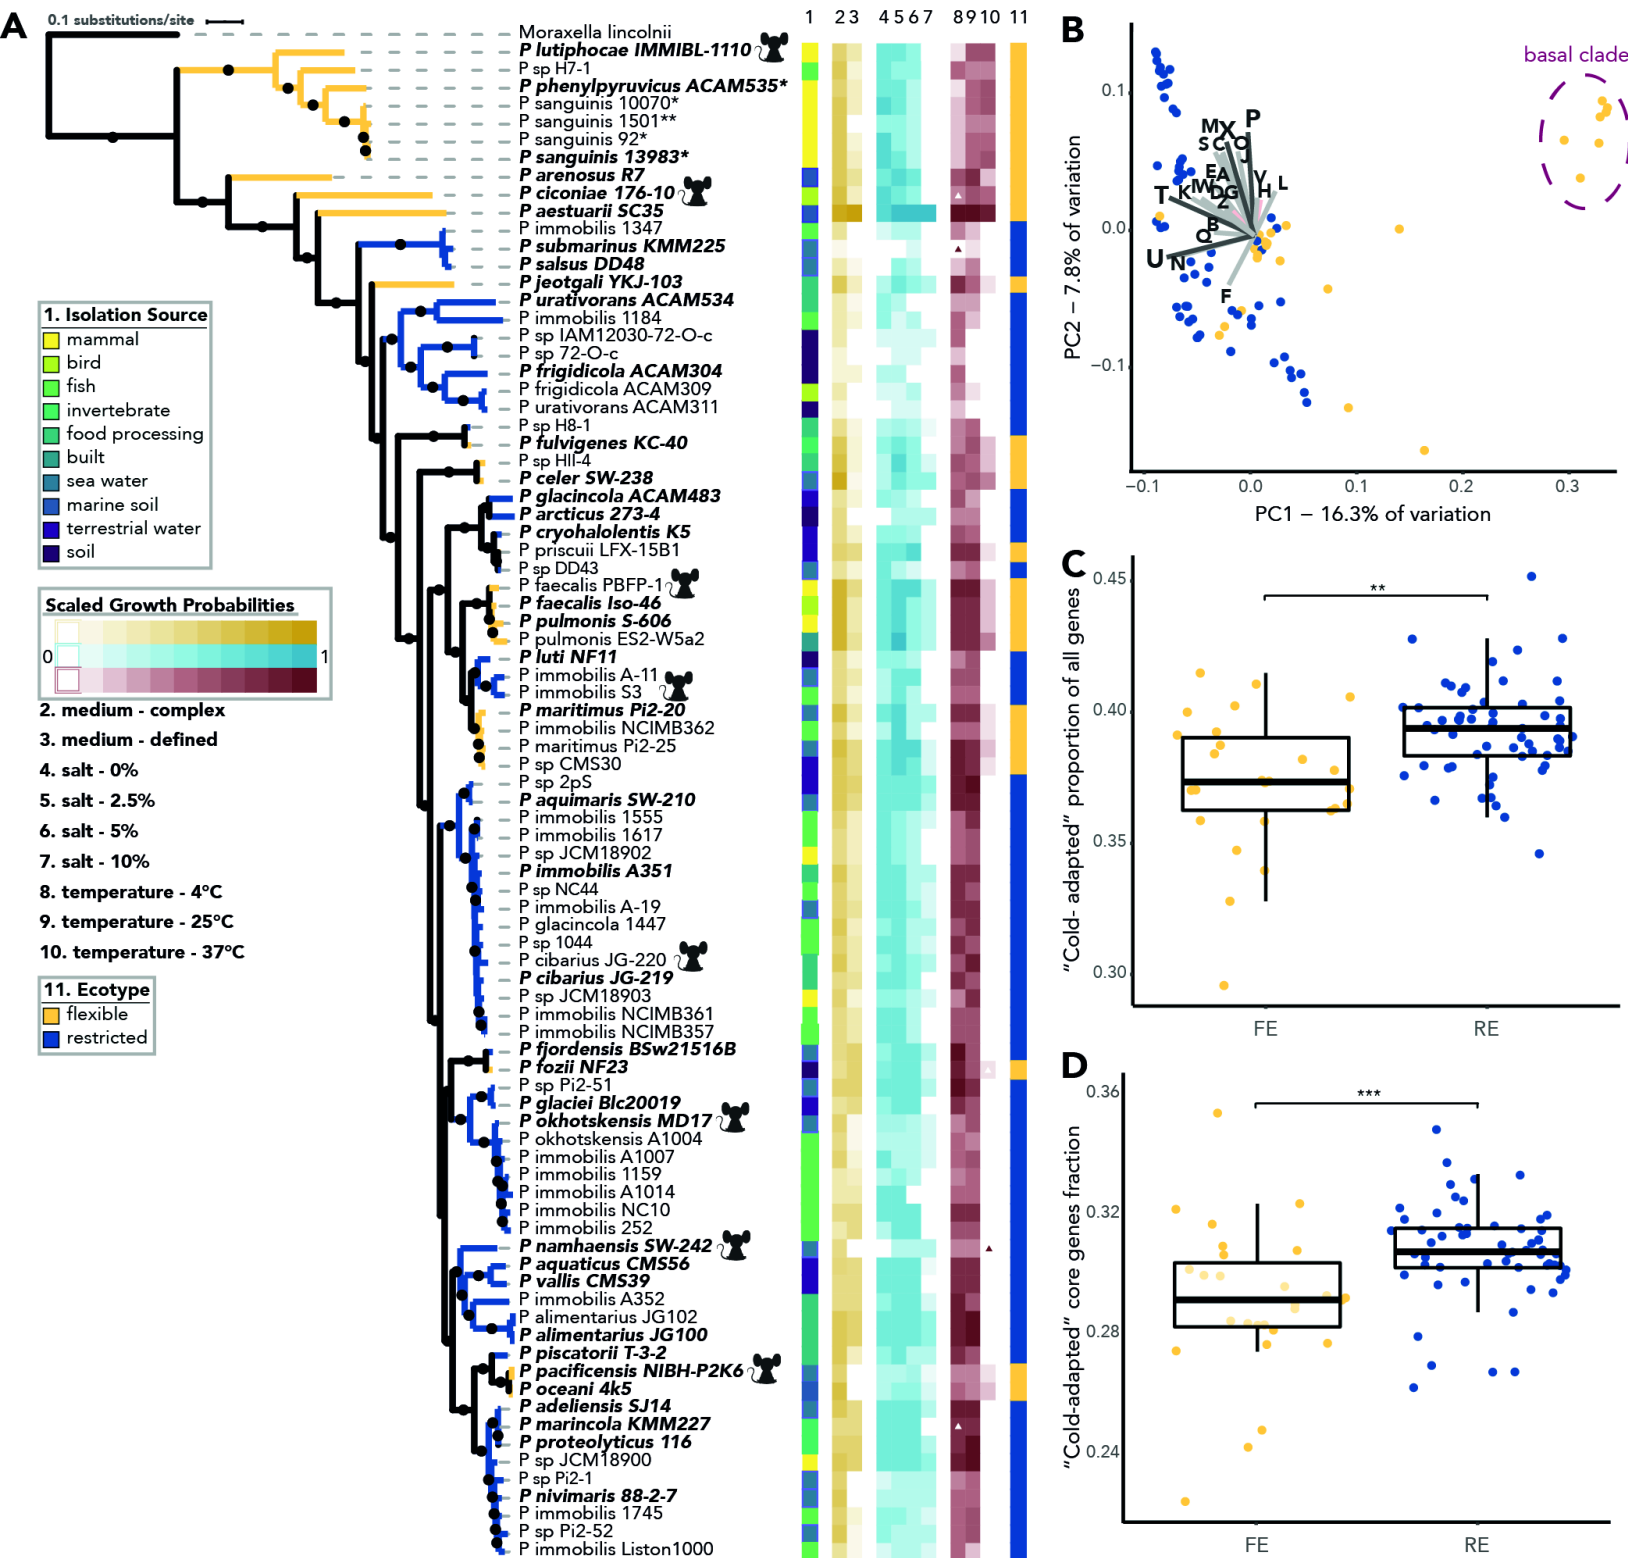

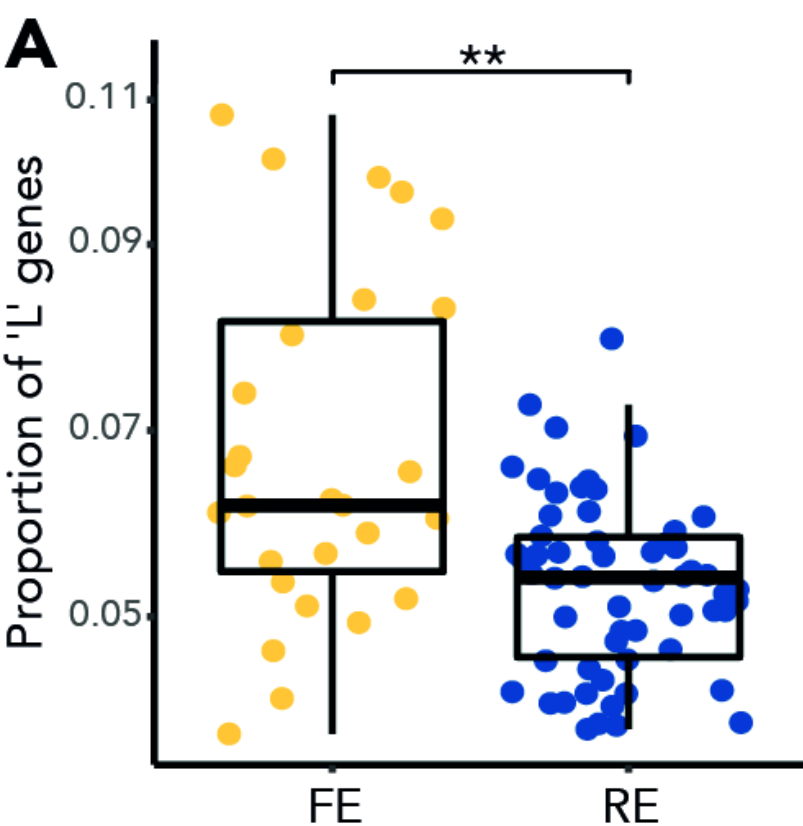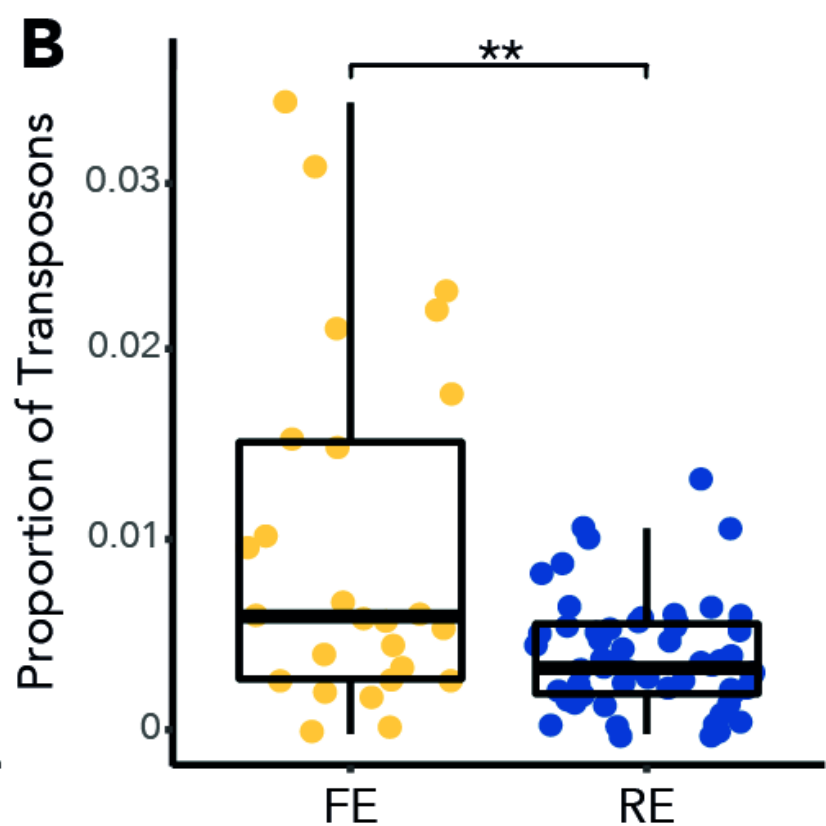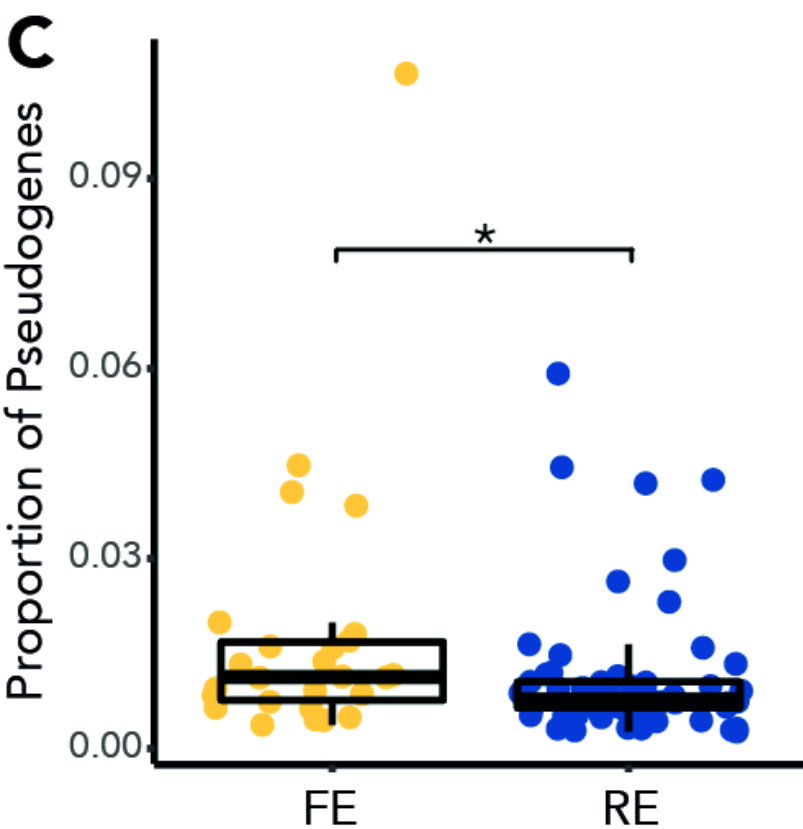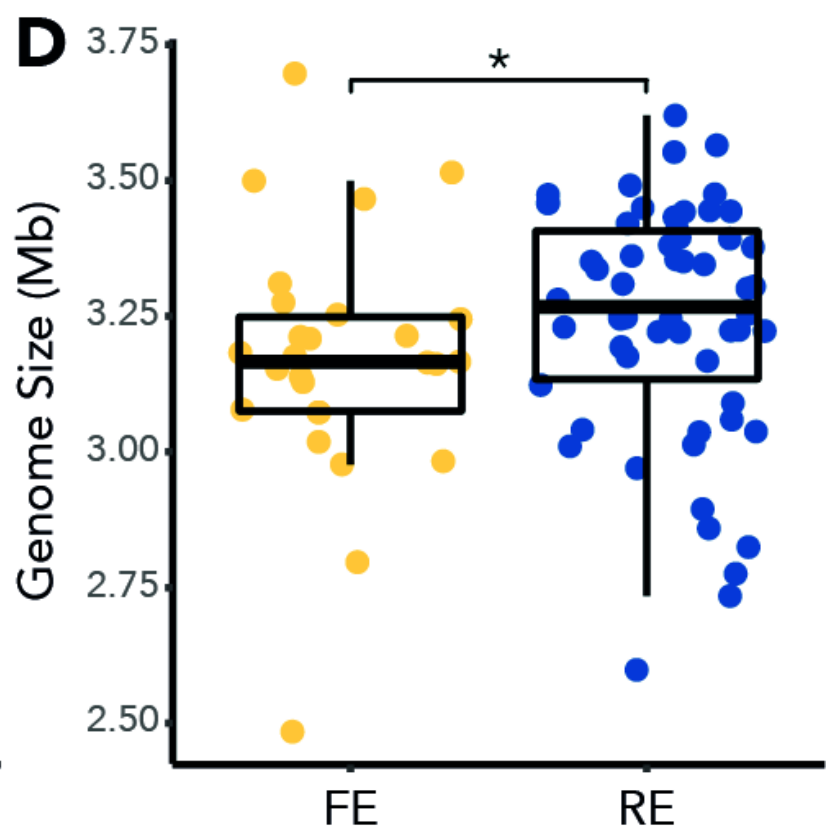

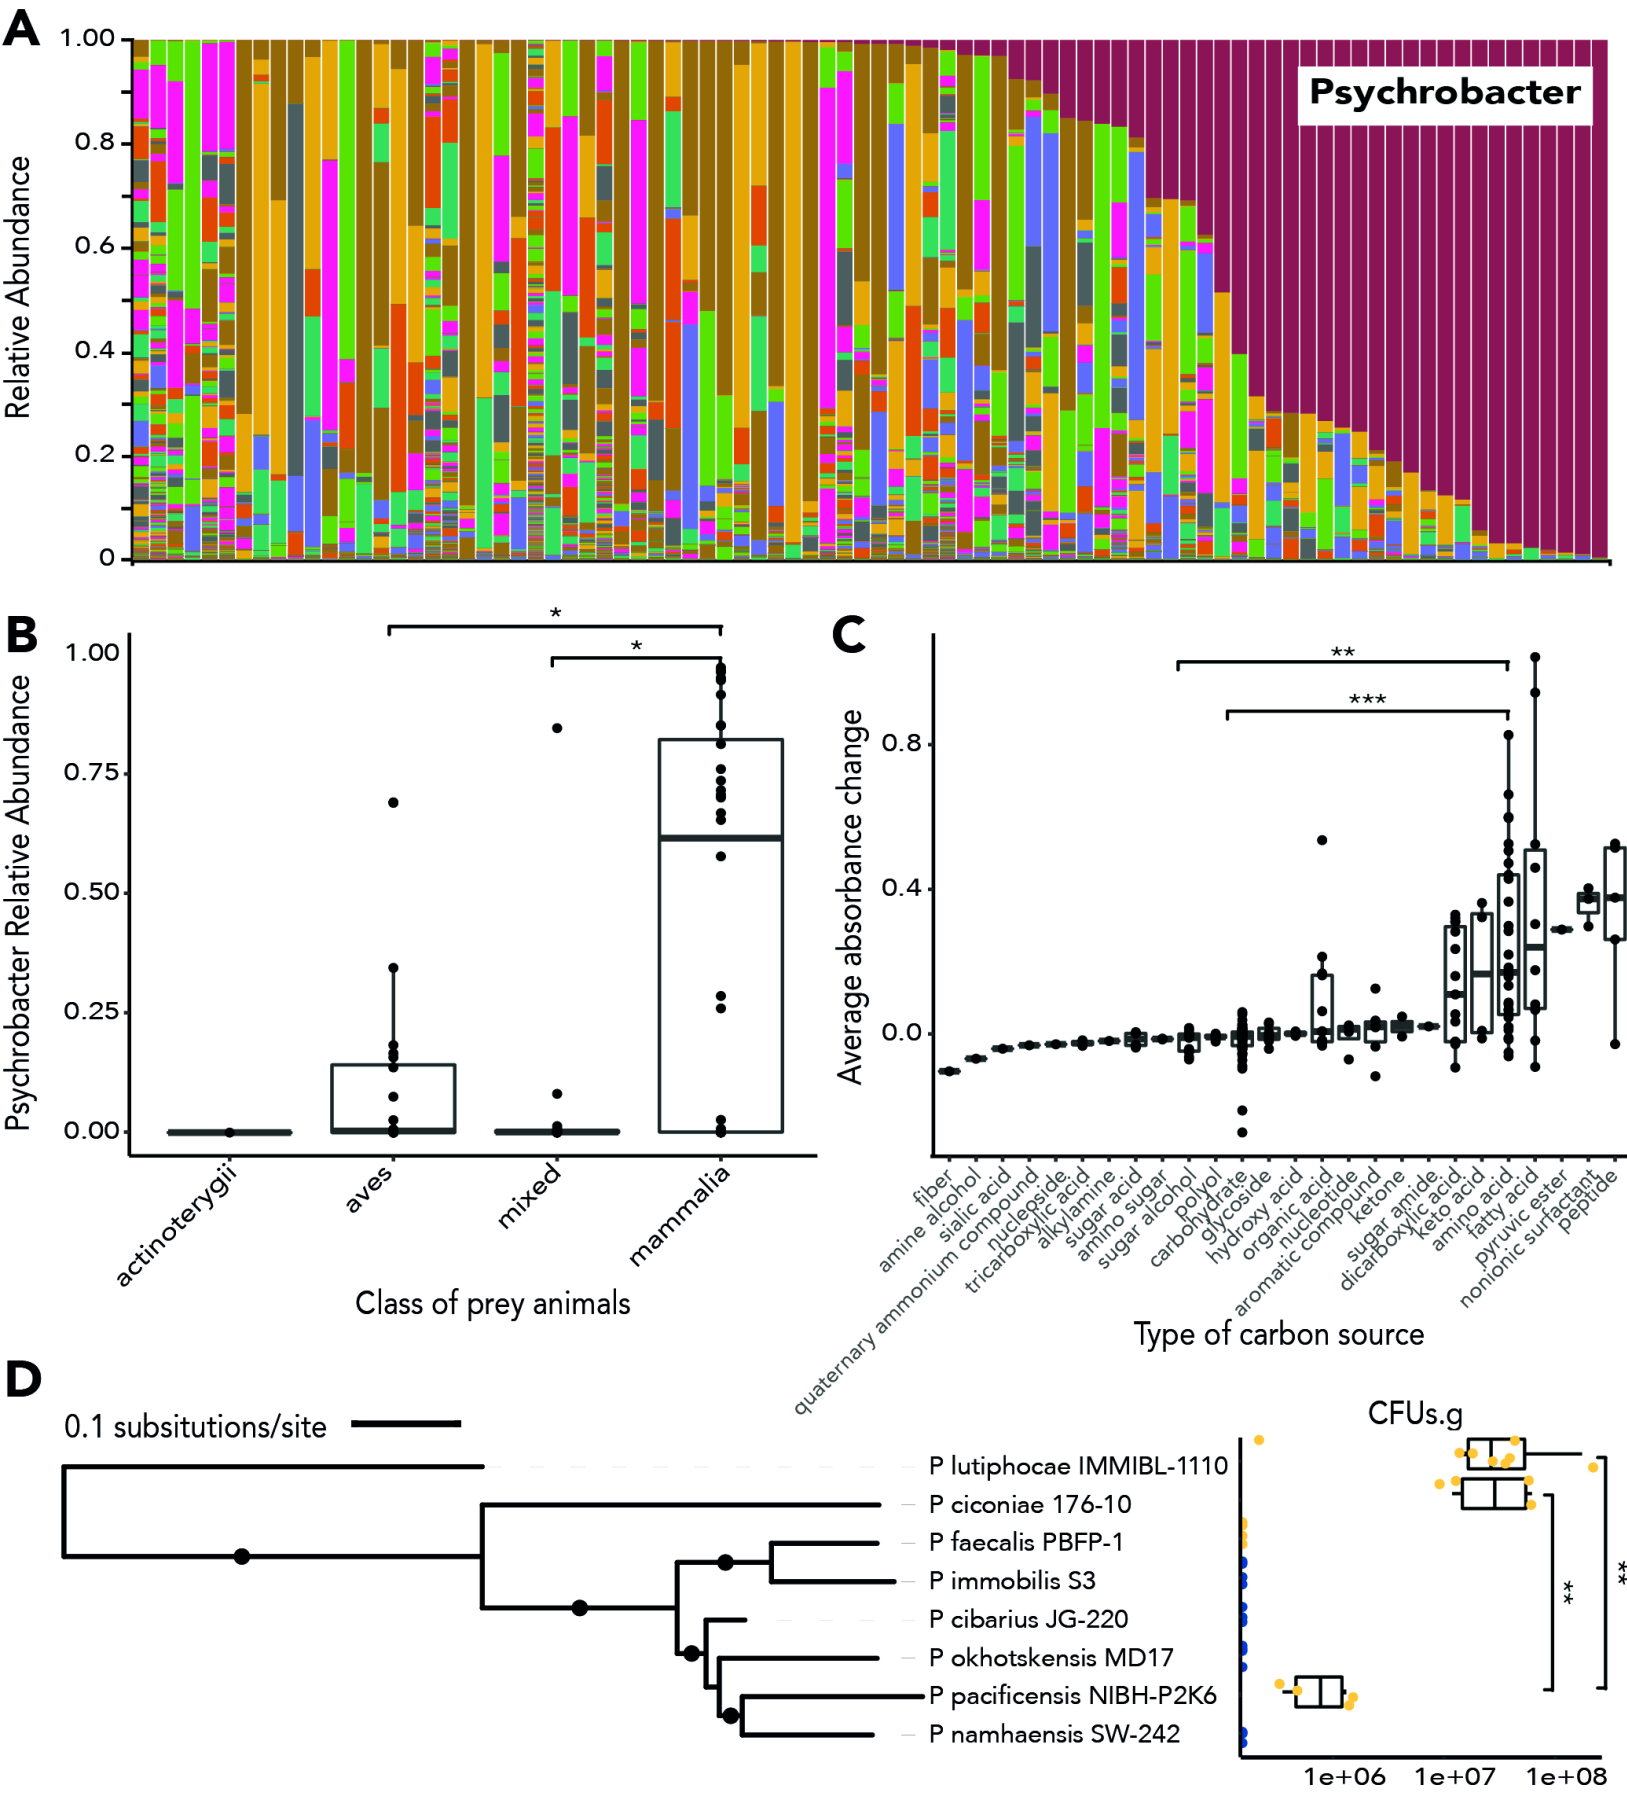

Source: https://www.biorxiv.org/content/10.1101/2020.10.23.352302v1.full.pdf
